# Supplementary material for: Evaluation of Free Online ADMET Tools for Academic or Small Biotech Environments
Source: MDPI journal article supplement (doi:10.3390/molecules28020776), 2023-01-12
Supplement: s1 [file s1]

|                                          | PHYSICOCHEMICAL PROPERTIES |              |            | ABSORPTION    |            |            |            | DISTRIBUTION |            | METABOLISM    |                    |             |              | EXCRETION |             | TOXICITY              |                     |             |             |                      |  |
|------------------------------------------|----------------------------|--------------|------------|---------------|------------|------------|------------|--------------|------------|---------------|--------------------|-------------|--------------|-----------|-------------|-----------------------|---------------------|-------------|-------------|----------------------|--|
| Software or Webserver                    | <i>log P</i>               | <i>log S</i> | <i>pKa</i> | <i>Caco-2</i> | <i>HIA</i> | <i>HOB</i> | <i>Pgp</i> | <i>BBB</i>   | <i>PPB</i> | <i>CYP450</i> | <i>Metabolites</i> | <i>HLMS</i> | <i>Sites</i> | <i>Cl</i> | <i>t1/2</i> | <i>Acute toxicity</i> | <i>Carcinogenic</i> | <i>hERG</i> | <i>AMES</i> | <i>Drug-likeness</i> |  |
| <a href="#">OCHEM</a>                    |                            |              |            |               |            |            |            |              |            |               |                    |             |              |           |             |                       |                     |             |             |                      |  |
| <a href="#">OSIRIS Property Explorer</a> |                            |              |            |               |            |            |            |              |            |               |                    |             |              |           |             |                       |                     |             |             |                      |  |
| <a href="#">Pallas System</a>            |                            |              |            |               |            |            |            |              |            |               |                    |             |              |           |             |                       |                     |             |             |                      |  |
| <a href="#">Percepta</a>                 |                            |              |            |               |            |            |            |              |            |               |                    |             |              |           |             |                       |                     |             |             |                      |  |
| <a href="#">Phoenix</a>                  |                            |              |            |               |            |            |            |              |            |               |                    |             |              |           |             |                       |                     |             |             |                      |  |
| <a href="#">pKCSM</a>                    |                            |              |            |               |            |            |            |              |            |               |                    |             |              |           |             |                       |                     |             |             |                      |  |
| <a href="#">PK-Sim</a>                   |                            |              |            |               |            |            |            |              |            |               |                    |             |              |           |             |                       |                     |             |             |                      |  |
| <a href="#">PreADMET</a>                 |                            |              |            |               |            |            |            |              |            |               |                    |             |              |           |             |                       |                     |             |             |                      |  |
| <a href="#">QikProp</a>                  |                            |              |            |               |            |            |            |              |            |               |                    |             |              |           |             |                       |                     |             |             |                      |  |
| <a href="#">SmartCYP</a>                 |                            |              |            |               |            |            |            |              |            |               |                    |             |              |           |             |                       |                     |             |             |                      |  |
| <a href="#">StarDrop</a>                 |                            |              |            |               |            |            |            |              |            |               |                    |             |              |           |             |                       |                     |             |             |                      |  |
| <a href="#">SwissADME</a>                |                            |              |            |               |            |            |            |              |            |               |                    |             |              |           |             |                       |                     |             |             |                      |  |
| <a href="#">vNN-ADMET</a>                |                            |              |            |               |            |            |            |              |            |               |                    |             |              |           |             |                       |                     |             |             |                      |  |
| <a href="#">Way2Drug</a>                 |                            |              |            |               |            |            |            |              |            |               |                    |             |              |           |             |                       |                     |             |             |                      |  |
| <a href="#">XenoSite</a>                 |                            |              |            |               |            |            |            |              |            |               |                    |             |              |           |             |                       |                     |             |             |                      |  |
