# Supplementary material for: Evaluation of Free Online ADMET Tools for Academic or Small Biotech Environments
Source: MDPI journal article supplement (doi:10.3390/molecules28020776), 2023-01-12
Supplement: s1 [file s1]

| NAME                                                                | FUNCTION                                                                                                                                                 | DISTRIBUTION                                                                                                     | PLATFORM   | INPUT - single/database           | OUTPUT                            | PREDICTION MODEL                                                                    | AVAILABILITY                                                                                                   | EXTRA INFORMATION                                                                                                                                                                   |
|---------------------------------------------------------------------|----------------------------------------------------------------------------------------------------------------------------------------------------------|------------------------------------------------------------------------------------------------------------------|------------|-----------------------------------|-----------------------------------|-------------------------------------------------------------------------------------|----------------------------------------------------------------------------------------------------------------|-------------------------------------------------------------------------------------------------------------------------------------------------------------------------------------|
| <a href="#">ADMETlab</a>                                            | Accurate and comprehensive predictions of ADMET properties: evaluation & screening                                                                       | CBDD team of Central South University of Shejiang University                                                     | Web-server | Draw, sdf, smiles & txt - s/d     | Online & download (csv or pdf)    | Multi-task graph attention (MGA) framework                                          | Free webserver                                                                                                 | Fast, easy to handle and user friendly                                                                                                                                              |
| <a href="#">ADMET Predictor</a>                                     | The flagship machine learnig platform for ADMET modeling, with extended capabilities for data analysis, metabolism prediction, and AI-driven drug design | Simulation Plus, Inc.                                                                                            | Software   | Mol & sdf - s/d                   | Data & graph                      | Finger prints & QSAR models                                                         | Possibe DEMO request                                                                                           | Specialized modules: ADMET modeler, high-throughput pharmacokinetic (HTPK) simulator, MedChem studio, metabolism, biopharmaceutical, toxicity & transporters                        |
| <a href="#">admetSAR</a>                                            | admetSAR creates a user-friendly interface to search ADME/T properties                                                                                   | Honhbin Yang (current maintainer), originally created by Feixiong Cheng and Yadi Zhou                            | Web-server | Smiles - s/d(10)                  | Online & download (csv)           | Support vector machine, k-nearest neighbors & nueral network                        | Free for non-commetial use                                                                                     | Optimization of lead compounds using scaffold hopping and ADMET screening                                                                                                           |
| <a href="#">ADMEWORKS</a>                                           | System for predicting the pharmacokinetics and safety of drugs and chemicals based on their chemical structure                                           | Fujitsu Global                                                                                                   | Software   | Mol & sdf - s                     | Prediction map & descriptors list | Multiple linear regresion                                                           | External service                                                                                               | Predictor & model builder modules. Non-disclosure agreement                                                                                                                         |
| <a href="#">Bioclipse</a>                                           | Metabolic site predictor of xenobiotic metabolism                                                                                                        | Proteochemometric Group, Uppsala University (Sweeden) & Metabolism Team at the European Bioinformatics Institute | Software   | Sdf - s/d                         | Tabular format                    | Statistical analysis & circular fingerprint                                         | Donation required to download                                                                                  | Provides advanced functionality in fields such as cheminformatics, bioinformatics, semantic web, spectrum analysis, drug discovery, safety assessment & general chemistry education |
| <a href="#">BioTransformer 3.0</a>                                  | Metabolism prediction webserver                                                                                                                          | Wishart Research Group, University of Alberta (Canada)                                                           | Web-server | Sdf & smiles - s                  | Online & download (csv or sdf)    | Rule-based or maching-learning model                                                | Online or download (it gives all possible transformation - NO ranking)                                         | 5 modules: EC-based, CYP450, Phase II, Human Gut Microbial & Environmental Microbial                                                                                                |
| <a href="#">BIOVIA</a>                                              | Assessment the potential risk posed by unfavorable pharmacokinetic properties and potential toxicity                                                     | Dassault Systèmes                                                                                                | Software   |                                   |                                   | <a href="#">JRC QSAR models</a>                                                     | External service                                                                                               | <a href="#">European Commission, Joint Research Centre (JRC) (2020): JRC QSAR Model Database. European Commission, Joint Research Centre (JRC)</a>                                  |
| <a href="#">Computational Resources for Drug Discovery (OSCADD)</a> | Predicting drug-likeness, metabolism & toxicity                                                                                                          | Dept. Computational Biology, Indraprastha Institute of Information Technology, India                             | Web-server | JME editor, mol, sdf & smiles - s | Online or mailed                  | Machine-learnig (SVM) - QSAR                                                        | Java Runtime Environtment required                                                                             | MetaPred, ToxiPred, DrugMint & QED                                                                                                                                                  |
| <a href="#">CYP Rules</a>                                           | Predicts the metabolizing Cytochromes P450 inhibition                                                                                                    | Computational Molecular Design & Detection Laboratory, National Taiwan University                                | Web-server | Sdf - s                           | Online                            | <a href="#">C5.0 algorithm based on Mold2 2D descriptors</a>                        |                                                                                                                |                                                                                                                                                                                     |
| <a href="#">Derek &amp; Meteor Nexus</a>                            | Expert, knowledge-based software that gives fast and accurate toxicity predictions                                                                       | Lhasa Limited                                                                                                    | Software   | Mol & sdf - s/d                   |                                   | QSAR (rule-based & statistical-based)                                               | 1 month free demo                                                                                              | Identification, categorization, quantification & control of potentially genotoxic impurities to limit potential carcinogenic risk (ICH M7)                                          |
| <a href="#">DrugLogit</a>                                           | Clasification as drug or non-drug & disease category                                                                                                     | Institute of Chemistry, University of Tartu, Estonia                                                             | Web-server | Drug-like properties required - s | Online graph & probability        | Logistic regression function                                                        | Java Runtime Environtment required                                                                             | You must enter some information: num. acceptors/donor H, total bonds, PSA, logP, total rings, MW, num. non-H atoms                                                                  |
| <a href="#">FAF-Drugs4</a>                                          | In silico ADMET filtering                                                                                                                                | INSERM, Paris Diderot Un iversity                                                                                | Web-server | Sdf & smiles - s/d                | Download (csv)                    |                                                                                     | <a href="#">The optimized web-server version is available on the Mobyle Portal hosted by the RPBS platform</a> | Possibility to get the results by email                                                                                                                                             |
| <a href="#">IMPACT-F</a>                                            | Expert system to estimate oral bioavailability of drug-candidates in humans                                                                              | Pharmainformatic, Germany                                                                                        | Software   | Mol & sdf                         |                                   | QSAR models                                                                         | External service                                                                                               |                                                                                                                                                                                     |
| <a href="#">IMPACTS</a>                                             | In-silico metabolism prediction by Activated Cytochromes & Transition States (IMPACTS)                                                                   | Molecular Forecaster Inc.                                                                                        | Software   | Draw, mol & sdf - s               | Download (csv)                    | Docking, transition state modelling, and rule-based substrate reactivity prediction | Academic free tool & non-acadmic license                                                                       | Tutorias available                                                                                                                                                                  |
| <a href="#">Lazar</a>                                               | Predictics toxicity datasets by similarity                                                                                                               | OpenRiskNet - EU project                                                                                         | Web-server | Draw & smiles - s                 | Text                              | Lazy Structure -Activity Relationsip                                                | Log in                                                                                                         | Could not find similar substances for threshold 0.2 with experimental data in the training dataset.                                                                                 |
| <a href="#">MetaTox</a>                                             | Predict the structure, probability & toxicity of metbolites                                                                                              | Institute of Biomedical Chemistry (IBMC), Moscow, Russia                                                         | Web-server | Draw & sdf - s                    | Graph & drawn molecules           | Collection of biotransformation reactions & QSAR models                             | Free webserver                                                                                                 | You can select the methabolic reaction                                                                                                                                              |
| <a href="#">Molecular Discovery</a>                                 | ADME properties                                                                                                                                          | Molecular Discovery Company                                                                                      | Software   | Mol & sdf                         | Draw & values                     | Grid molecular interactions - NO training set dependent                             | 1, 2 or 3 years contract                                                                                       | MetaSite, MoKa, VolSurf+, MetaDesign                                                                                                                                                |

| NAME                                     | FUNCTION                                                                                                               | DISTRIBUTION                                                                            | PLATFORM   | INPUT - single/database     | OUTPUT                            | PREDICTION MODEL                                                                                                 | AVAILABILITY                                                | EXTRA INFORMATION                                                                                                                                                                |
|------------------------------------------|------------------------------------------------------------------------------------------------------------------------|-----------------------------------------------------------------------------------------|------------|-----------------------------|-----------------------------------|------------------------------------------------------------------------------------------------------------------|-------------------------------------------------------------|----------------------------------------------------------------------------------------------------------------------------------------------------------------------------------|
| <a href="#">MultiCASE</a>                | Modeling and predicting toxicity of chemicals and xenobiotic metabolites                                               | MultiCASE Inc.                                                                          | Software   | Sdf & smiles - s/d          | Document in word, csv, sdf        | QSAR models & machine learning algorithms                                                                        | Licensing or external service                               | Following ICH M7 methodologies. Ensure security for your property information                                                                                                    |
| <a href="#">NERDD</a>                    | New E-Resources for Drug Discovery - Metabolism                                                                        | Hamburg University                                                                      | Web-server | Draw, sdf & smiles - s      |                                   |                                                                                                                  |                                                             | Each parameter has to be calculated independently                                                                                                                                |
| <a href="#">OCHEM</a>                    | Online chemical dataset for prediction properties                                                                      | Helmholtz Zentrum Muenchen (GmbH)                                                       | Web-server | Draw, sdf & smiles - s      | Download (csv or sdf)             | QSAR models & machine learning algorithms                                                                        | Registration required                                       |                                                                                                                                                                                  |
| <a href="#">OSIRIS Property Explorer</a> | Toxicity & drug-likeness properties                                                                                    | Idorsia Pharmaceuticals Ltd, Switzerland                                                | Software   | Draw                        | Color bar & percentage            | Topological descriptors & fingerprints                                                                           | Java Runtime Environment and Oracle VirtualBox are required | Predicted information is kept on your computer but for converting smiles to a structure, some text information is sent to servers in Switzerland                                 |
| <a href="#">Pallas System</a>            | Predicts the most common ADME properties (modules)                                                                     | CompuDrug                                                                               | Software   | Mol & sdf                   | Table, graph, sdf or RDF          |                                                                                                                  | DEMO request - 1 month rental                               |                                                                                                                                                                                  |
| <a href="#">Percepta</a>                 | Platform for <i>in silico</i> molecular property calculations                                                          | ACD/Labs                                                                                | Software   | Mol & sdf- s/d              | Data & color-mapping              | QSAR models                                                                                                      | DEMO request                                                |                                                                                                                                                                                  |
| <a href="#">Phoenix</a>                  | Biosimulation of ADMET properties                                                                                      | Certara                                                                                 | Software   | Mol & sdf                   | Data & graph                      | Non-compartmental analysis (NCA) & descriptive statistics                                                        | External service                                            |                                                                                                                                                                                  |
| <a href="#">pKCSM</a>                    | A novel approach to the prediction of pharmacokinetic properties, which relies on graph-based signatures               | Bio21 Institute, University of Melbourne                                                | Web-server | Data (smiles) - s/d         | Tabular format                    | Machine-learning platform that relies on distance/pharmacophore patterns encoded as graph-based signatures       | Academic free tool & non-academic license                   | Disclaimer: no molecule information will be retained on the system after being uploaded by the user                                                                              |
| <a href="#">PK-Sim</a>                   | Mechanistic modeling of pharmacokinetic & dynamics                                                                     | Open Systems Pharmacology                                                               | Software   |                             | Graphs                            | Modular concept to allow efficient multi-scale modelling and simulation                                          | Free download                                               | Software specialized in clinical models, allows to create simulations of existing drugs                                                                                          |
| <a href="#">PreADMET</a>                 | Predicting ADMET data & building drug-like library                                                                     |                                                                                         | Web-server | Draw & mol - s              | Download (csv, excel, sdf or pdf) |                                                                                                                  | Free webserver                                              | Calculations are run for each of modules (ADME, toxicity & drug-likeness)                                                                                                        |
| <a href="#">QikProp</a>                  | Rapid ADME predictor for drug candidates                                                                               | Schrödinger                                                                             | Software   | Mol & sdf                   |                                   | Predictions based on 3D molecular structures; unlike fragment-based approaches                                   | Registration required & trial request                       | Academic license                                                                                                                                                                 |
| <a href="#">SmartCYP</a>                 | Site of metabolism prediction for Cytochrome P450s                                                                     | University of Copenhagen                                                                | Web-server | Draw, mol, sdf & smiles - s | Graph & table                     | Precomputed activation energies from density functional theory (DFT)                                             | Java Runtime Environment required                           |                                                                                                                                                                                  |
| <a href="#">StarDrop</a>                 | Allows the identification of the region of a molecule that are the most vulnerable to metabolism                       | Optibrium                                                                               | Software   | Pdb                         | Data & graph                      | QSAR models                                                                                                      | DEMO request                                                | Every prediction is accompanied by an estimate of confidence                                                                                                                     |
| <a href="#">SwissADME</a>                | Predictive models for physicochemical properties, pharmacokinetics, druglikeness and medicinal chemistry friendliness. | Molecular Modeling Group of the SIB Swiss Institute of Bioinformatics                   | Web-server | Draw & smiles - s/d         | Online or download (csv & pdf)    |                                                                                                                  | Login-free website                                          | Permitted use (private study, internal research and commercial or non-commercial basis. SIB is committed to ensuring your privacy and the confidentiality of your personal data) |
| <a href="#">vNN-ADMET</a>                | Public webserver to predict ADMET properties to build new models based on variable nearest neighbor (vNN)              | Telemedicine and Advanced Technology Research Center (TATRC)                            | Web-server | Draw, smiles & txt - s/d    | Categorization table              | Variable nearest neighbor (vNN) methodology                                                                      | Register required                                           | Get the results by email                                                                                                                                                         |
| <a href="#">Way2Drug</a>                 | Web-server for in silico prediction site of metabolism (SOM)                                                           | Dpt. Bioinformatics, Institute of Biometrical Chemistry of Rus. Acad. Med. Sci (Moscow) | Web-server | Smile - s                   | Online & download (sdf & pdf)     | Prediction of Activity Spectra for Substrates & LMNA descriptors                                                 |                                                             |                                                                                                                                                                                  |
| <a href="#">XenoSite</a>                 | Predicting atomic sites that will undergo metabolized by CYP450                                                        | Center for Biological Systems Engineering, Washington University in St. Louis           | Web-server | Sdf & smiles - s/d          | TSV format & images (PNG)         | Topological & quantum mechanics description in combination with reactivity of atomic sites: neural-network model |                                                             |                                                                                                                                                                                  |
