# Supplementary material for: Evaluation of Free Online ADMET Tools for Academic or Small Biotech Environments
Source: Molecules. 2023 Jan 12;28(2):776. doi: 10.3390/molecules28020776 (PMC9864198; doi:10.3390/molecules28020776)
Supplement: Supplementary file 1 [file molecules-28-00776-s001.zip]

Archive with 5 entries (5 files):
- Table S1 Software and webservers evaluated for ADMET predictions.pdf
- Table S2 Predicted ADMET parameters for each software and webserver.pdf
- Table S3 Bibliographic data of 24 FDA-approved TKIs.xlsx
- Table S4 Predictions obtained for 24 TKIs using 8 free webservers.xlsx
- Table S5 Comparisons and statistical analysis for each pharmacokinetic parameter.xlsx
