# Supplementary material for: Evaluation of Free Online ADMET Tools for Academic or Small Biotech Environments
Source: Molecules. 2023 Jan 12;28(2):776. doi: 10.3390/molecules28020776 (PMC9864198; doi:10.3390/molecules28020776)
Supplement: Supplementary file 1 [file molecules-28-00776-s001.zip › Table S3 Bibliographic data of 24 FDA-approved TKIs.xlsx]

## Sheet: TKI - data PubChem
	Entry	INN	ID	Commercial	Brand	IUPAC	Structure	Molecular weight	Protein	Disease	Smile	Solubility (DB)	g/L (HMDB)	LogP (HSDB)	pKa	Absorption	Protein binding	Major (minor) cytochrome	Principal metabolite	t1/2	Clearance (L/h)	Toxicity	Mutagenicity (Ames)	Carginogenic	Acute toxicity	FDA
	1	Imatinib	STI571	Glivec	Novartis	4-[(4-methylpiperazin-1-yl)methyl]-N-[4-methyl-3-[(4-pyridin-3-ylpyrimidin-2-yl)amino]phenyl]benzamide		493.6	PDGFR, c-KIT, BCR-ABL fusion protein	chronic myelogenous leukemia (Ph+CML), GIST	CC1=C(C=C(C=C1)NC(=O)C2=CC=C(C=C2)CN3CCN(CC3)C)NC4=NC=CC(=N4)C5=CN=CC=C5	very solube (pH<5.5)	0.0146	3	8,07, 3,73, 2,56, 1,52	Absolute bioavailability (98%)	0.95	3A4 & 3A5 (1A2, 2D6, 2C9, 2C19, 1A1 & 1B1)	N-desmethylimatinib	18	11.8	N.A.	YES	0.167	0.833	Approved 05/2001
	2	Gefitinib	ZD1839	Iressa	Astra Zeneca	N-(3-chloro-4-fluorophenyl)-7-methoxy-6-(3-morpholinopropoxy)quinazolin-4-amine		446.91	EGFR	Non-small cell lung cancer (NSCLC)	COC1=C(C=C2C(=C1)N=CN=C2NC3=CC(=C(C=C3)F)Cl)OCCCN4CCOCC4	Sparingly soluble (pH<4)	0.027	3.2	5,4 & 7,2	Slowly absorption (60%)	0.9	3A4, 3A5, 2D6 & 1A1	4-Defluoro-4-hydroxy Gefitinib, O-Desmethyl Gefitinib	48	35.7	Reproductive toxicity	N.A.	0.58	1	Approved 05/2003
	3	Erlotinib	OSI-1774	Tarceva	OSI Pharmaceuticals	N-(3-ethynylphenyl)-6,7-bis(2-methoxyethoxy)quinazolin-4-amine		393.44	EGFR	NSCLC, metastatic pancreatic cancer	COCCOC1=C(C=C2C(=C1)C(=NC=N2)NC3=CC=CC(=C3)C#C)OCCOC	very slightly soluble (pH<2)	0.00891	2.7	5.18	Slowly absorption (60-100%)	0.93	3A4 & 3A5 (1A1, 1A2, 2C8 & 2D6)	O-demethylation, oxidation of the acetylene moiety to COOH, hydroxylation of the aromatic ring	36.2	5.3	Aqueous toxicity	N.A.	0.75	0.25	Approved 11/2004
	4	Sorafenib	Bay43-9006	Nexavar	Bayer Healthcare	4-(4-(3-(4-chloro-3-(trifluoromethyl)phenyl)ureido)phenoxy)-N-methylpicolinamide		464.09	PDGFR, VEGFR-2, BRAF, c-KIT	liver & reN.A.l cancer, HHC	CNC(=O)C1=NC=CC(OC2=CC=C(NC(=O)NC3=CC(=C(Cl)C=C3)C(F)(F)F)C=C2)=C1	Insoluble	0.00171	3.8	N.A.	Slow absorption (38-49%)	0.995	3A4	Pyridine N-oxide	25-48	3	Reproductive & aqueous toxicity	N.A.	0.5	0	Approved 12/2005
	5	Sunitinib	SU11248	Sutent	Pfizer	(Z)-N-(2-(diethylamino)ethyl)-5-((5-fluoro-2-oxoindolin-3-ylidene)methyl)-2,4-dimethyl-1H-pyrrole-3-carboxamide		398.48	PDGFR, VEGFR2, c-KIT, FLT-3	GIST, reN.A.l cancer, metastatic pancreatic cancer	CCN(CC)CCNC(=O)C1=C(NC(=C1C)C=C2C3=C(C=CC(=C3)F)NC2=O)C	Soluble (1,2 <pH<6,8)	0.0308	5.2	8.95	Good bioavailability (50%)	90-95%	3A4	N-desethyl derivative	40-60	34-62	Hepatotoxicity	N.A.	N.A.	N.A.	Approved 01/2006
	6	Dasatinib	BMS-354825	Sprycel	Brstol-Meyers Squibb	N-(2-chloro-6-methylphenyl)-2-((6-(4-(2-hydroxyethyl)piperazin-1-yl)-2-methylpyrimidin-4-yl)amino)thiazole-5-carboxamide		488.01	PDGFR, c-KIT, BCR-ABL fusion protein & SRC-family proteins	lymphoblastic or chronic myeloid leukemia (CML)	CC1=C(C(=CC=C1)Cl)NC(=O)C2=CN=C(S2)NC3=CC(=NC(=N3)C)N4CCN(CC4)CCO	Very soluble	0.0128	1.8	N.A.	Good bioavailability (81%)	0.96	3A4	N.A.	3-5	N.A.	Reproductive & aqueous toxicity	N.A.	0.93	0.99	Approved 06/2006
	7	Lapatinib	GW572016	Tykerb	GlazoSmith Kline	N-(3-chloro-4-((3-fluorobenzyl)oxy)phenyl)-6-(5-(((2-(methylsulfonyl)ethyl)amino)methyl)furan-2-yl)quinazolin-4-amine		581.06	EGFR, HER2	HER-negative breast cancer, lung cancer	CS(=O)(=O)CCNCC1=CC=C(O1)C2=CC3=C(C=C2)N=CN=C3NC4=CC(=C(C=C4)OCC5=CC(=CC=C5)F)Cl	Soluble	0.0223	5.4	3,8 & 7,20	Incomplete and variable	>99%	3A4 & 3A5 (2C19 & 2C8)	Reactive quinoneimine	14	N.A.	Hepatotoxicity	NO	NO	NO	Approved 03/2007
	8	Nilotinib	AMN107	TasigN.A.	Novartis	4-methyl-N-(3-(4-methyl-1H-imidazol-1-yl)-5-(trifluoromethyl)phenyl)-3-((4-(pyridin-3-yl)pyrimidin-2-yl)amino)benzamide		529.52	PDGFR, c-KIT, BCR-ABL fusion protein	Chronic myeloid leukemia (CML)	CC1=CN(C=N1)C1=CC(NC(=O)C2=CC=C(C)C(NC3=NC=CC(=N3)C3=CN=CC=C3)=C2)=CC(=C1)C(F)(F)F	pH dependant (<4)	0.002031	5.01	2,1 & 5,4	Increased with food	0.98	3A4	N.A.	17	29.1	Reproductive toxicity	NO	NO	NO	Approved 10/2007
	9	Vandetanib	ZD-6474	Caprelsa	Astra Zeneca	N-(4-bromo-2-fluorophenyl)-6-methoxy-7-((1-methylpiperidin-4-yl)methoxy)quinazolin-4-amine		475.36	EGFR, FGFR, VEGFR2, RET	Medullary thyroid cancer (MTC)	COC1=C(OCC2CCN(C)CC2)C=C2N=CN=C(NC3=C(F)C=C(Br)C=C3)C2=C1	Insoluble	0.008	5	4,46 & 13,8	Good (50-90%)	0.9	3A4 (FMO1/3)	N-oxide & N-desmethyl	19	N.A.	Hepatotoxicity	NO	N.A.	0.83	Approved 04/2011
	10	Axitinib	AG-013736	Inlyta	Pfizer Inc.	(E)-N-methyl-2-((3-(2-(pyridin-2-yl)vinyl)-1H-indazol-6-yl)thio)benzamide		486.47	PDGFR, VEGFR, c-KIT, FLT-3	Kidney & reN.A.l cell carcinoma (RCC)	CNC(=O)C1=CC=CC=C1SC2=CC3=C(C=C2)C(=NN3)C=CC4=CC=CC=N4	Insoluble	0.0002	N.A.	4.8	High bioavailability	0.99	3A4 & 3A5 (1A2 & 2C19)	N.A.	2,5-6,1	38	NO	YES	N.A.	0.54	Approved 01/2012
	11	Cabozantinib	XL184	Cabometyx	Exelixis Inc.	N-(4-((6,7-dimethoxyquinolin-4-yl)oxy)phenyl)-N-(4-fluorophenyl)cyclopropane-1,1-dicarboxamide		501.51	PDGFR, VEGFR, c-KIT, MET	Medullary thyroid cancer (MTC), hepatocellular carcinoma (HCC)	COC1=CC2=C(C=C1OC)C(OC1=CC=C(NC(=O)C3(CC3)C(=O)NC3=CC=C(F)C=C3)C=C1)=CC=N2	Insoluble	N.A.	N.A.	N.A.	High bioavailability	> 99,7%	3A4 (2C9)	N-oxide	55	4.4	Skin irritation	N.A.	N.A.	N.A.	Approved 04/2012
	12	Regorafenib	BAY 73-4506	Stivarga	Bayer Healthcare Pharmaceuticals	4-(4-(3-(4-chloro-3-(trifluoromethyl)phenyl)ureido)-3-fluorophenoxy)-N-methylpicolinamide		482.82	FGFR, PDGFR, VEGFR, BRAF, c-KIT, RET	Metastatic both colorectal cancer GIST	CNC(=O)C1=CC(OC2=CC(F)=C(NC(=O)NC3=CC=C(Cl)C(=C3)C(F)(F)F)C=C2)=CC=N1	Insoluble	N.A.	N.A.	N.A.	Moderate bioavailability (69-83%)	0.995	3A4 & UGT1A9	N-oxide, N-oxide+N-desmethyl	28	N.A.	Reproductive & aqueous toxicity	N.A.	N.A.	0.99	Approved 09/2012
	13	Afatinib	BIBW2992	Gilotrif	Boehringer Ingelheim Pharmaceutical, Inc.	(S,E)-N-(4-((3-chloro-4-fluorophenyl)amino)-7-((tetrahydrofuran-3-yl)oxy)quiN.A.zolin-6-yl)-4-(dimethylamino)but-2-enamide		485.94	EGFR, HER2, HER4	metastatic NSCLC	CN(C)C\C=C\C(=O)NC1=C(O[C@H]2CCOC2)C=C2N=CN=C(NC3=CC(Cl)=C(F)C=C3)C2=C1	Low solubility	N.A.	N.A.	N.A.	Bioavailability up to 92%	0.95	Covalent adducts to proteins	Covalent adducts to proteins	37	92	Respiratory toxicity	N.A.	N.A.	N.A.	Approval 06/2013
	14	Nintedanib	BIBF-1120	Ofev	Boehringer Ingelheim Pharmaceutical, Inc.	methyl (E)-2-hydroxy-3-(((4-(N-methyl-2-(4-methylpiperazin-1-yl)acetamido)phenyl)imino)(phenyl)methyl)-1H-indole-6-carboxylate		539.64	FGFR, PDGFR, VEGFR	Ideopatic pulmoN.A.ry fibrosis & NSCLC	CN1CCN(CC1)CC(=O)N(C)C2=CC=C(C=C2)N=C(C3=CC=CC=C3)C4=C(NC5=C4C=CC(=C5)C(=O)OC)O	Insoluble	0.00966	3	N.A.	Very low bioavailability (4,7%)	0.978	UGT enzymes	Hydrolytic cleabage: BIBF-1202	13.7	83	Skin irritation	N.A.	NO	0.8	Approved 10/2014
	15	Lenvatinib	E7080	Lenvima	Eisai Inc.	4-(3-chloro-4-(3-cyclopropylureido)phenoxy)-7-methoxyquinoline-6-carboxamide		426.86	VEGFR2, PDGFR, FGFR, RET, c-KIT	Differentiated thyropid cancer (DTC), hepatocellular carcinoma (HCC), reN.A.l cell carcinoma (RCC)	COC1=CC2=NC=CC(=C2C=C1C(=O)N)OC3=CC(=C(C=C3)NC(=O)NC4CC4)Cl	Insoluble	N.A.	3.3	5.05	High bioavailability	98-99%	3A4	N.A.	28	N.A.	Hypertension	N.A.	N.A.	N.A.	Approved 02/2015
	16	Osimertinib	AZD-9291	Tagrisso	AstraZeneca	N-(2-((2-(dimethylamino)ethyl)(methyl)amino)-4-methoxy-5-((4-(1-methyl-1H-indol-3-yl)pyrimidin-2-yl)amino)phenyl)acrylamide		499.62	EGFR	NSCLC	CN1C=C(C2=CC=CC=C21)C3=NC(=NC=C3)NC4=C(C=C(C(=C4)NC(=O)C=C)N(C)CCN(C)C)OC	Soluble	N.A.	N.A.	N.A.	Moderate bioavailability	> 90%	3A4	AZ7550 & AZ5104	48	14.2	N.A.	N.A.	N.A.	N.A.	Approved 11/2015
	17	Brigatinib	AP-26113	Alunbring	Ariad Pharmaceuticals	(2-((5-chloro-2-((2-methoxy-4-(4-(4-methylpiperazin-1-yl)piperidin-1-yl)phenyl)amino)pyrimidin-4-yl)amino)phenyl)dimethylphosphine oxide		584.1	EGFR, IGFR, EML4-ALK	ALK-rearranged metastatic NSCLC	COC1=CC(=CC=C1NC1=NC=C(Cl)C(NC2=CC=CC=C2P(C)(C)=O)=N1)N1CCC(CC1)N1CCN(C)CC1	Insoluble	N.A.	5.17	N.A.	Low bioavailability	0.66	2C8 & 3A4	N-demethylated & cysteine conjugated	25	12.7	Reproductive & aqueous toxicity	NO	N.A.	1	Approved 04/2017
	18	Neratinib	HKI-272	Nerlynx	Puma Biotechnology, Inc.	(E)-N-(4-((3-chloro-4-(pyridin-2-ylmethoxy)phenyl)amino)-3-cyano-7-ethoxyquinolin-6-yl)-4-(dimethylamino)but-2-enamide		557.05	EGFR, HER2 & HER4	Advanced breast cancer	CCOC1=C(C=C2C(=C1)N=CC(=C2NC3=CC(=C(C=C3)OCC4=CC=CC=N4)Cl)C#N)NC(=O)C=CCN(C)C	Poorly soluble	N.A.	N.A.	N.A.	Moderate bioavailability (65-71%)	0.99	3A4	N.A.	7-17	216	Reproductive toxicity	N.A.	N.A.	N.A.	Approved 07/2017
	19	Dacomitinib	PF299804	Vizimpro	Pfizer	(E)-N-(4-((3-chloro-4-fluorophenyl)amino)-7-methoxyquiN.A.zolin-6-yl)-4-(piperidin-1-yl)but-2-enamide		469.95	EGFR L858R, Del19, T790M, HER2, HER4	Non-small cancer: L858R	COC1=C(NC(=O)\C=C\CN2CCCCC2)C=C2C(NC3=CC(Cl)=C(F)C=C3)=NC=NC2=C1	Soluble	< 1 mg/mL	3.92	N.A.	High bioavailability (80%)	0.98	2D6 & 2C9 (3A4)	O-desmethyl	70	27	N.A.	NO	N.A.	N.A.	Approved 09/2018
	20	Erdafitinib	LDK378	Balversa	Janssen	N1-(3,5-dimethoxyphenyl)-N2-isopropyl-N1-(3-(1-methyl-1H-pyrazol-4-yl)quinoxalin-6-yl)ethane-1,2-diamine		445.56	FGFR1-4	Urothlial cancer	CC(C)NCCN(C1=CC2=NC(=CN=C2C=C1)C3=CN(N=C3)C)C4=CC(=CC(=C4)OC)OC	Soluble	< 1 mg/mL	N.A.	N.A.	Moderate bioavailability (51-65%)	0.998	2C9 & 3A4	Uncharged erdafitinib	59	0.362	Reproductive toxicity & skin irritation	NO	N.A.	1	Approved 04/2019
	21	Avapritinib	BLU-285	Ayvakit	Blueprint Medicines	(S)-1-(4-fluorophenyl)-1-(2-(4-(6-(1-methyl-1H-pyrazol-4-yl)pyrrolo[2,1-f][1,2,4]triazin-4-yl)piperazin-1-yl)pyrimidin-5-yl)ethan-1-amine		498.57	PDGFR, c-KIT	Multi-drug resistance GIST	CC(C1=CC=C(C=C1)F)(C2=CN=C(N=C2)N3CCN(CC3)C4=NC=NN5C4=CC(=C5)C6=CN(N=C6)C)N	Soluble	N.A.	N.A.	N.A.	Moderate bioavailability	0.988	3A4 & 2C9	Uncharged drug & hydroxy gluconide & oxidative deamiN.A.ted	32-57	19.5	N.A.	N.A.	N.A.	N.A.	Approved 01/2020
	22	Pemigatinib	INCB054828	Pemazyre	Incyte	3-(2,6-difluoro-3,5-dimethoxyphenyl)-1-ethyl-8-(morpholinomethyl)-1,3,4,7-tetrahydro-2H-pyrrolo[3',2':5,6]pyrido[4,3-d]pyrimidin-2-one		487.51	FGFR1-3	Cholangiocarcinoma	CCN1C2=C3C=C(NC3=NC=C2CN(C1=O)C4=C(C(=CC(=C4F)OC)OC)F)CN5CCOCC5	Very soluble	N.A.	N.A.	N.A.	Low bioavailability	0.906	3A4	Not yet characterized	15.4	10.6	Reproductive toxicity	N.A.	N.A.	N.A.	Approved 04/2020
	23	Ripretinib	DCC-2618	Qinlock	Deciphera Pharmaceuticals	1-(4-bromo-5-(1-ethyl-7-(methylamino)-2-oxo-1,2-dihydro-1,6-N.A.phthyridin-3-yl)-2-fluorophenyl)-3-phenylurea		510.37	PDGFR, VEGFR, BRAF, c-KIT	Advanced GIST	CCN1C2=CC(=NC=C2C=C(C1=O)C3=CC(=C(C=C3Br)F)NC(=O)NC4=CC=CC=C4)NC	Low solubility	N.A.	5.63	12.1	High bioavailability	0.99	3A4 (2D6 & 2E1)	DP-5439	14.8	15.3	Hepatotoxicity	N.A.	N.A.	N.A.	Approved 05/2020
	24	Tivozanib	AV-951	Fotivda	EUSA Pharma AVEO Pharmaceutical	1-(2-chloro-4-((6,7-dimethoxyquinolin-4-yl)oxy)phenyl)-3-(5-methylisoxazol-3-yl)urea		454.87	VEGFR	Advanced RCC	CC1=CC(=NO1)NC(=O)NC2=C(C=C(C=C2)OC3=C4C=C(C(=CC4=NC=C3)OC)OC)Cl	Very soluble	< 1 g/mL	4.31	11.74	High bioavailability	>99%	3A4	Uncharged tivozanib	111	0.75	N.A.	N.A.	N.A.	N.A.	Approved 10/2021
							Mean	487.555
							Desv. Std	48.6253
