# Supplementary material for: Evaluation of Free Online ADMET Tools for Academic or Small Biotech Environments
Source: Molecules. 2023 Jan 12;28(2):776. doi: 10.3390/molecules28020776 (PMC9864198; doi:10.3390/molecules28020776)
Supplement: Supplementary file 1 [file molecules-28-00776-s001.zip › Table S4 Predictions obtained for 24 TKIs using 8 free webservers.xlsx]

## Sheet: ADMETlab 2.0
	Entry	LogS (log mol/L)	LogD	LogP	F(20%)+ (Prob.)	F(30%)+ (Prob.)	Caco-2 (log cm/s)	HIA+ (Prob.)	Pgp-inh	Pgp-sub	BBB+ (Prob.)	PPB (%)	CYP1A2-inh	CYP1A2-sub	CYP2C19-inh	CYP2C19-sub	CYP2C9-inh	CYP2C9-sub	CYP2D6-inh	CYP2D6-sub	CYP3A4-inh	CYP3A4-sub	Cl (mL/min/kg)	t1/2 <3 (Prob.)	hERG+ (Prob.)	Acute tox.+ (Prob.)	Ames+ (Prob.)	Carcinogenicity+ (Prob.)	Lipinski
	1	-3.287	3.144	3.805	0.017	0.008	-5.576	0.072	0.999	0.996	0.977	90.3869	0.375	0.915	0.419	0.088	0.202	0.159	0.243	0.868	0.871	0.898	8295	0.107	0.99	0.6	0.093	0.044	Accepted
	2	-4.477	3.465	3.822	0.008	0.007	-4.968	0.002	0.935	0.985	0.578	95.5953	0.875	0.741	0.684	0.742	0.237	0.553	0.966	0.874	0.909	0.814	8197	0.107	0.928	0.693	0.411	0.074	Accepted
	3	-4.667	3.024	2.497	0.015	0.27	-4.668	0.023	0.149	0.018	0.2	91.2217	0.984	0.943	0.69	0.284	0.627	0.525	0.861	0.104	0.898	0.85	10125	0.286	0.289	0.12	0.584	0.225	Accepted
	4	-6.543	3.564	5.103	0.001	0.001	-5.296	0.021	0.048	0.053	0.512	98.3765	0.517	0.147	0.944	0.092	0.923	0.946	0.654	0.897	0.723	0.216	5014	0.081	0.765	0.609	0.54	0.331	Accepted
	5	-2.915	0.00262	3.112	0.992	0.013	-5.408	0.019	0.436	0.997	0.463	91.4088	0.691	0.951	0.049	0.062	0.04	0.395	0.637	0.894	0.441	0.657	5946	0.455	0.645	0.936	0.739	0.466	Accepted
	6	-4.278	2.922	2.807	0.992	0.99	-4.871	0.005	0.748	0.992	0.816	93.9494	0.319	0.885	0.473	0.202	0.658	0.322	0.641	0.834	0.657	0.913	2788	0.052	0.802	0.727	0.268	0.948	Accepted
	7	-4.072	3.479	4.307	0.003	0.999	-5.707	0.006	0.999	0.995	0.043	95.6019	0.972	0.212	0.94	0.086	0.948	0.683	0.98	0.369	0.97	0.821	3997	0.066	0.92	0.388	0.536	0.022	Accepted
	8	-4.009	3.881	4.894	0.001	0	-5.112	0.005	0.996	0.962	0.016	98.0359	0.854	0.876	0.839	0.056	0.91	0.043	0.81	0.079	0.96	0.777	4495	0.33	0.982	0.659	0.387	0.027	Accepted
	9	-4.282	3.614	4.281	0.001	0.004	-5.041	0.012	0.997	0.648	0.972	91.0927	0.842	0.867	0.26	0.853	0.055	0.319	0.976	0.89	0.456	0.864	5401	0.106	0.988	0.718	0.015	0.047	Accepted
	10	-4.251	3.577	3.826	0.003	0.007	-5.042	0.011	0.791	0.02	0.597	97.8081	0.967	0.484	0.966	0.086	0.945	0.974	0.152	0.919	0.863	0.217	5.5	0.134	0.424	0.053	0.757	0.811	Accepted
	11	-6.608	3.429	4.332	0.001	0.03	-0.00526	0.004	0.998	0.029	0.041	97.7425	0.104	0.931	0.512	0.485	0.785	0.891	0.017	0.887	0.556	0.886	3505	0.183	0.237	0.812	0.823	0.896	Accepted
	12	-6.778	3.618	0.00527	0.001	0.001	-5.405	0.007	0.111	0.052	0.196	9.89741	0.536	0.431	0.948	0.102	0.91	0.95	0.661	0.903	0.816	0.167	4807	0.076	0.617	0.8	0.695	0.313	Accepted
	13	-4.481	3.218	3.339	0.003	0.423	-4.691	0.002	0.905	0.535	0.792	9.03006	0.753	0.46	0.947	0.098	0.773	0.188	0.944	0.225	0.914	0.663	9071	0.265	0.577	0.617	0.814	0.608	Accepted
	14	-3.773	3.036	3.466	0.173	0.121	-5.716	0.673	0.998	0.083	0.883	9.47907	0.347	0.94	0.299	0.75	0.205	0.602	0.049	0.677	0.525	0.949	4039	0.026	0.935	0.204	0.018	0.078	Accepted
	15	-7.121	2.873	3.137	0.002	0.857	-5.281	0.006	0.01	0.996	0.503	0.0960688	0.665	0.792	0.581	0.126	0.6	0.77	0.298	0.689	0.613	0.154	3472	0.154	0.704	0.351	0.541	0.597	Accepted
	16	-4.698	3.521	3.848	0.01	0.084	-5.424	0.01	0.998	0.965	0.867	87.1238	0.416	0.956	0.08	0.155	0.051	0.319	0.113	0.878	0.169	0.923	5966	0.291	0.933	0.868	0.883	0.695	Accepted
	17	-3.537	2.894	3.009	0.838	0.016	-4.915	0.012	0.999	0.999	0.748	63.9684	0.052	0.918	0.154	0.161	0.015	0.05	0.002	0.052	0.255	0.94	3747	0.366	0.981	0.59	0.131	0.221	Accepted
	18	-4.565	3.325	3.857	0.001	0.004	-5.103	0.005	0.505	0.014	0.048	9.77207	0.662	0.932	0.708	0.156	0.727	0.901	0.616	0.922	0.901	0.849	3974	0.551	0.892	0.551	0.824	0.073	Accepted
	19	-4.334	0.00353	4.275	0.002	0.002	-5.282	0.004	0.997	0.995	0.751	96.3147	0.629	0.605	0.72	0.285	0.456	0.727	0.963	0.884	0.815	0.543	5099	0.203	0.978	0.887	0.683	0.087	Accepted
	20	-4.047	3.401	4.416	0.002	0.53	-4.967	0.005	0.999	0.259	0.237	88.1188	0.843	0.92	0.236	0.888	0.085	0.744	0.145	0.924	0.669	0.892	6.85	0.193	0.906	0.17	0.072	0.063	Accepted
	21	-4.164	2.542	3.597	0.001	0.004	-4.814	0.003	0.991	0.564	0.366	91.9144	0.215	0.591	0.73	0.196	0.545	0.152	0.034	0.194	0.427	0.926	7686	0.037	0.812	0.16	0.209	0.96	Accepted
	22	-3.902	2.833	2.951	0.135	0.054	-5.107	0.002	0.004	0.085	0.851	0.828416	0.12	0.741	0.723	0.87	0.341	0.602	0.612	0.854	0.71	0.924	7267	0.324	0.782	0.742	0.538	0.139	Accepted
	23	-7.439	3.934	5.227	0.001	0.04	-5.376	0.033	0.982	0.842	0.757	97.1564	0.669	0.646	0.882	0.071	0.875	0.61	0.89	0.906	0.784	0.245	3717	0.151	0.885	0.488	0.932	0.07	Rejected
	24	-6.048	3.608	4.015	0.001	0.07	-5.264	0.01	0.116	0.958	0.041	9.92379	0.612	0.958	0.935	0.739	0.865	0.919	0.513	0.914	0.838	0.644	3447	0.306	0.228	0.319	0.878	0.82	Accepted

## Sheet: admetSAR
	Entry	logP	HIA	Caco-2	BBB	HOB	P-gp inhibition	P-gp substrate	CYP3A4 substrate	CYP2C9 substrate	CYP2D6 substrate	CYP3A4 inhibition	CYP2C9 inhibition	CYP2D19 inhibition	CYP2D6 inhibition	Carcinogenicity	Ames	Acute toxicity	logS	PPB (100%)
	1	4.59	0.9884	-0.8139	0.9906	0.7857	0.9511	0.7666	0.6474	-0.8	-0.7101	-0.9313	-0.8813	-0.8516	-0.7933	-0.7143	-0.59	0.7058	-2.849	1.012
	2	4.28	0.9937	-0.5623	0.9909	0.9	0.8836	-0.8125	0.6674	-0.8176	0.4132	0.8206	-0.6272	0.644	-0.6536	-0.9857	-0.54	0.7006	-3.595	0.926
	3	3.41	0.9867	0.5686	0.9778	0.8143	0.9297	-0.6913	0.5852	-0.7939	-0.8167	0.7194	-0.5739	0.598	-0.6329	-0.9286	-0.57	0.6971	-3.159	0.99
	4	5.55	0.9447	-0.7743	0.9781	-0.7714	0.6579	-0.7647	0.6576	-0.6146	-0.865	-0.7339	-0.6171	0.637	-0.9145	-0.8	-0.51	0.4977	-4.579	1.017
	5	3.33	0.976	-0.6101	0.9752	0.9	0.5899	0.8007	0.6352	-0.806	-0.8229	-0.5991	-0.6437	-0.6261	-0.6846	-0.8571	-0.52	0.5912	-3.217	0.758
	6	3.31	0.9389	-0.8061	0.9665	-0.8571	0.7043	-0.8192	0.713	-0.8018	-0.38195	0.7295	0.8008	0.574	-0.3853	-0.8714	0.52	0.6476	-3.764	0.939
	7	6.14	0.9814	-0.8511	0.9738	-0.8429	0.8639	0.9343	0.6943	-1	-0.7463	0.8065	-0.5544	0.5274	-0.7861	-0.9286	-0.54	0.5949	-3.647	1.063
	8	6.36	0.9614	-0.8021	0.9772	-0.6857	0.8382	0.9343	0.6277	-0.6161	-0.887	0.6784	-0.5739	0.5554	-0.8275	-0.71473	0.54	0.5433	-4.281	0.99
	9	5	0.9925	-0.5229	0.9925	0.5857	0.8935	0.642	0.6385	-0.8149	0.4604	0.5288	-0.7749	0.5867	0.7333	-0.9429	-0.52	0.652	-3.65	0.973
	10	4.64	0.9319	-0.6666	0.978	-0.6	0.6743	0.5558	0.5768	-1	-0.8725	0.7865	0.6434	0.6454	-0.7351	-0.831	-0.56	0.5982	-3.182	0.98
	11	5.54	0.9325	-0.8125	0.9656	0.7714	0.8762	-0.566	0.6675	-0.8005	-0.7744	-0.6808	-0.6228	-0.7587	-0.8819	-0.8857	-0.55	0.5229	-3.622	1.012
	12	5.69	0.943	-0.7602	0.9781	-0.6857	0.6767	-0.632	0.6596	-0.613	-0.8621	-0.7339	-0.6171	0.637	-0.9145	-0.8	-0.52	0.4977	-4.579	1.025
	13	4.39	0.9535	-0.6583	0.9738	0.6286	0.9009	0.5191	0.7171	-0.7935	-0.7895	-0.6486	-0.7294	-0.7625	-0.5877	-0.8857	-0.53	0.6927	-3.474	0.99
	14	4.04	0.9791	-0.7614	0.8694	-0.7857	0.883	0.7414	0.6999	-0.8012	-0.7697	-0.6456	-0.7729	-0.8332	-0.8735	-0.9	-0.51	0.7132	-3.392	0.891
	15	4.07	0.9845	-0.7193	0.9743	0.6571	0.7011	0.6316	0.6583	0.5962	-0.8337	0.5	-0.6474	-0.6218	-0.8149	-0.8534	-0.61	0.5484	-4.023	1.03
	16	4.51	0.982	-0.7249	0.9717	0.5857	0.8475	0.7586	0.7243	-1	-0.7337	0.7324	-0.822	-0.8382	-0.7998	-0.7819	0.56	0.6358	-3.549	0.883
	17	5.09	0.9926	-0.8002	0.9812	0.6429	0.8381	0.7141	0.7128	-0.5976	-0.6771	-0.6629	-0.7762	-0.6184	-0.8217	-0.9714	-0.54	0.5995	-3.747	1.145
	18	5.93	0.9553	-0.8289	0.9764	0.6	0.8968	0.674	0.7417	-1	-0.8176	0.6708	-0.6545	-0.6181	-0.7381	-0.7888	-0.54	0.6594	-4.261	1.03
	19	5.16	0.9718	-0.7284	0.9868	0.6857	0.8268	0.5	0.6719	-0.8069	-0.7699	0.8521	0.5678	0.6526	-0.8219	-0.8646	-0.66	0.5555	-3.975	0.9723
	20	4.18	0.9965	-0.6055	0.9889	-0.5286	0.8872	0.7481	0.6182	-1	0.4024	-0.5297	-0.6063	0.5551	0.5642	-0.9857	0.56	0.7124	-3.244	0.826
	21	2.61	0.9941	-0.8423	0.9888	0.5429	0.898	0.781	0.6478	-1	-0.709	-0.8382	-0.5987	0.5089	-0.8493	-0.8857	-0.62	0.5266	-3.401	0.979
	22	3.66	0.9934	-0.5794	0.9813	0.6857	0.7653	0.774	0.6287	-1	-0.6718	0.6032	-0.6278	-0.8103	-0.7887	-0.9134	0.61	0.7036	-3.766	0.517
	23	5.67	0.9738	-0.6886	0.9855	-0.5	0.7212	-0.5235	0.6043	-0.8075	-0.8971	-0.8795	-0.6154	-0.8343	-0.8997	-0.8571	-0.51	0.722	-4.009	0.994
	24	5.64	0.9883	-0.6207	0.9743	0.7	0.8302	-0.6273	0.679	-1	-0.8415	0.5317	-0.6665	-0.5198	-0.8784	-0.8857	0.53	0.587	-3.825	0.891

## Sheet: FAF-Drug4
	Entry	Solubility (mg/L)	Solubility	logSw	logP	logD	Oral bioavailability	Drug-like
	1	3613.29	Reduced	-4.92	3.52	3.45	Good	Accepted
	2	4560.23	Reduced	-4.58	3.63	3.64	Good	Accepted
	3	8316.35	Reduced	-3.86	3.19	3.2	Good	Accepted
	4	2648.9	Reduced	-5.17	4.07	4.34	Good	Accepted
	5	10348.6	Good	-3.65	2.63	1.28	Good	Accepted
	6	3759.61	Reduced	-4.87	3.59	2.45	Good	Accepted
	7	1127.46	Reduced	-6.24	5.12	4.43	Good	Accepted
	8	1187.87	Reduced	-6.1	4.9	4.38	Good	Accepted
	9	3460.82	Reduced	-4.92	3.67	2.81	Good	Accepted
	10	2962.45	Reduced	-4.87	4.17	4.15	Good	Accepted
	11	1143.04	Reduced	-6.08	5.39	4.65	Good	Accepted
	12	2310.77	Reduced	-5.34	4.17	3.84	Good	Accepted
	13	3925.08	Reduced	-4.82	3.64	2.34	Good	Accepted
	14	2036.69	Reduced	-5.58	4.3	3.82	Good	Accepted
	15	7328.85	Good	-4.06	2.75	1.87	Good	Accepted
	16	3937.94	Reduced	-4.84	3.72	3.01	Good	Accepted
	17	1402.95	Reduced	-6.03	4.65	2.11	Good	Accepted
	18	1569.78	Reduced	-5.87	4.87	3.05	Good	Accepted
	19	3216.66	Reduced	-4.98	3.95	3.53	Good	Accepted
	20	6316.69	Reduced	-4.26	3.17	1.25	Good	Accepted
	21	8484.45	Reduced	-4.07	1.86	1.92	Good	Accepted
	22	10991.9	Good	-3.79	1.82	1.79	Good	Accepted
	23	1942.18	Reduced	-5.57	4.12	3.73	Good	Accepted
	24	2751.76	Reduced	-5.11	4.03	3.56	Good	Accepted

## Sheet: OCHEM
	Entry	Solubility (-log S)	logPow	CYP1A2	CYP2X9	CYP2C19	CYP2D6	CYP3A4	AMES
	1	4.4	3.9	inhibitor	inhibitor	non-inh.	inhibitor	inhibitor	active
	2	5	3.3	inhibitor	inhibitor	inhibitor	inhibitor	inhibitor	active
	3	4.1	3.1	inhibitor	inhibitor	inhibitor	inhibitor	inhibitor	active
	4	5.5	3.9	inhibitor	inhibitor	inhibitor	non-inh.	non-inh.	inactive
	5	4.2	2.6	non-inh.	non-inh.	non-inh.	non-inh.	non-inh.	inactive
	6	5	3.6	non-inh.	inhibitor	inhibitor	non-inh.	non-inh.	inactive
	7	out of model domain	out of model domain	inhibitor	inhibitor	inhibitor	inhibitor	inhibitor	inactive
	8	out of model domain	out of model domain	inhibitor	inhibitor	inhibitor	non-inh.	inhibitor	active
	9	5.6	4	inhibitor	non-inh.	inhibitor	inhibitor	inhibitor	active
	10	out of model domain	3.8	inhibitor	inhibitor	inhibitor	inhibitor	inhibitor	active
	11	out of model domain	3.6	non-inh.	inhibitor	inhibitor	non-inh.	inhibitor	active
	12	out of model domain	4.2	inhibitor	inhibitor	inhibitor	non-inh.	non-inh.	inactive
	13	4.9	3.2	inhibitor	non-inh.	non-inh.	inhibitor	inhibitor	active
	14	4.2	3.3	non-inh.	non-inh.	non-inh.	non-inh.	inhibitor	inactive
	15	out of model domain	3	inhibitor	inhibitor	inhibitor	non-inh.	inhibitor	active
	16	out of model domain	3.8	inhibitor	non-inh.	non-inh.	non-inh.	inhibitor	active
	17	out of model domain	4.6	non-inh.	non-inh.	non-inh.	inhibitor	inhibitor	active
	18	out of model domain	4.3	inhibitor	non-inh.	non-inh.	non-inh.	inhibitor	active
	19	5.7	4.1	inhibitor	inhibitor	non-inh.	non-inh.	inhibitor	active
	20	3.6	1.8	inhibitor	non-inh.	inhibitor	inhibitor	non-inh.	inactive
	21	out of model domain	out of model domain	inhibitor	inhibitor	inhibitor	inhibitor	inhibitor	inactive
	22	4.4	2.3	non-inh.	non-inh.	inhibitor	non-inh.	inhibitor	active
	23	out of model domain	4.7	inhibitor	inhibitor	inhibitor	non-inh.	inhibitor	active
	24	out of model domain	3	inhibitor	inhibitor	inhibitor	non-inh.	inhibitor	active

## Sheet: pkSCM
	Entry	logP	Solubility (log mol/L)	Caco2 (log cm/s)	HIA (%)	P-gp	BBB (log BB)	CYP2D6	CYP3A4	CYP1A2i	CYP2C19i	CYP2C9i	Cl (log mL/min/kg)	AMES	hERG
	1	4.59	-3.031	1.092	93.8	s/i	-1.376	no	s/i	no	yes	yes	0.716	no	yes
	2	4.28	-4.124	1.246	90.9	s/i	-0.738	no	s/i	yes	no	no	0.937	no	yes
	3	3.4	-4.403	1.238	95.5	i	-0.67	no	s/i	yes	yes	yes	0.591	no	yes
	4	5.55	-5.089	0.959	85.3	s/i	-1.642	no	s	no	yes	yes	-0.212	no	yes
	5	3.33	-4.164	0.917	89.068	s/i	-0.9	s	s/i	no	no	no	0.96	no	yes
	6	3.31	-3.073	0.878	83.217	s/i	-1.53	no	s/i	no	no	no	0.477	no	no
	7	6.139	-4.324	-0.402	100	s/i	-0.785	no	s/i	no	yes	yes	0.542	yes	yes
	8	6.35	-2.927	1.728	100	s/i	-1.152	no	s/i	no	yes	yes	0.44	no	yes
	9	5.004	-4.919	2.128	90.8	s/i	-0.264	no	i	no	no	no	0.584	no	yes
	10	4.639	-4.04	0.913	92.3	s/i	-1.087	no	s/i	yes	yes	yes	0.116	yes	yes
	11	5.54	-4.489	0.859	100	s/i	-0.574	no	s/i	no	yes	yes	0.251	no	yes
	12	5.68	-4.993	0.554	84.28	s/i	-1.804	no	s/i	no	yes	yes	-0.036	no	yes
	13	4.38	-4.696	0.998	93.277	s/i	-1.384	no	s/i	no	no	yes	0.612	no	yes
	14	4.0394	-4.492	0.104	77.419	s/i	-1.012	no	s/i	no	yes	yes	0.465	no	yes
	15	4.07	-3.376	0.031	88.88	s/i	-1.342	no	s/i	no	no	yes	0.213	no	yes
	16	4.51	-3.299	1.138	93.4	s/i	-1.129	no	s/i	no	yes	yes	0.632	no	yes
	17	5.09	-3.466	1.104	87.59	s/i	-1.179	no	s/i	no	yes	yes	0.417	no	yes
	18	5.93	-4.046	0.112	92.28	s/i	-1.666	i	s/i	no	yes	yes	0.714	no	yes
	19	5.1551	-4.246	0.575	92.64	s/i	-1.476	no	s/i	no	no	no	0.674	no	yes
	20	4.1836	-4.329	1.141	96.149	s/i	-1.032	no	s/i	no	no	no	0.69	no	yes
	21	2.6077	-2.795	1.894	99.84	s/i	-1.528	no	s/i	no	yes	no	0.276	no	yes
	22	3.657	-3.112	1.303	93.61	s/i	-2.068	no	s/i	no	no	no	0.773	no	yes
	23	5.6707	-3.871	0.904	90.123	s/i	-1.316	no	s/i	yes	yes	yes	-0.073	no	yes
	24	5.53	-4.321	0.323	100	s/i	-0.6006	no	s/i	no	yes	yes	0.43	no	yes

## Sheet: preADMET
	Entry	Water sol. (mg/L)	logP	Caco2 (nm/sec)	HIA (%)	Pgp	BBB (c.brain/c.blood)	PPB (%)	2C19	2C9	2D6	3A4	Ames	hERG (risk)
	1	1.17645	4.2205	43.2834	96.1129	inhibitor	0.0817968	85.5999	inhibitor	inhibitor	inh / sub	substrate	no	medium
	2	0.23161	4.2033	54.1474	96.63	non-inhibitor	0.0476259	80.73	non-inhibitor	inhibitor	substrate	substrate	yes	medium
	3	1.13532	4.3099	54.8782	96.2891	inhibitor	0.0416394	93.1511	non-inhibitor	inhibitor	non-inhibitor	substrate	yes	medium
	4	0.415217	4.1758	22.596	93.5005	inhibitor	1.00027	89.8652	non-inhibitor	inhibitor	non-inhibitor	non-inhibitor	no	medium
	5	24.0401	2.8911	34.7689	90.0859	non-inhibitor	0.908823	64.2213	non-inhibitor	non-inhibitor	non-inhibitor	substrate	yes	medium
	6	1.70202	3.4393	32.0059	93.6076	non-inhibitor	0.0350358	70.2529	inhibitor	inhibitor	substrate	inhibitor	yes	medium
	7	0.000123322	6.0417	17.9906	96.8674	inhibitor	0.0313863	97.564	non-inhibitor	inhibitor	non-inhibitor	substrate	no	low
	8	0.0954388	5.0842	23.0707	95.9731	inhibitor	0.0371764	92.5801	non-inhibitor	inhibitor	non-inhibitor	substrate	yes	medium
	9	0.118446	5.0874	52.5431	97.0141	inhibitor	0.63581	82.8887	non-inhibitor	non-inhibitor	inh / sub	substrate	yes	medium
	10	0.287353	4.2795	21.4829	94.0065	inhibitor	1.00568	93.1129	non-inhibitor	non-inhibitor	non-inhibitor	non-inhibitor	yes	high
	11	0.036182	4.3428	23.6193	95.8447	inhibitor	0.0359432	89.2871	non-inhibitor	inhibitor	non-inhibitor	non-inhibitor	no	medium
	12	0.205199	4.3813	22.4366	93.5182	inhibitor	1.31554	91.051	non-inhibitor	inhibitor	non-inhibitor	non-inhibitor	yes	medium
	13	0.187199	3.9174	39.9582	95.9003	inhibitor	0.189383	79.5061	non-inhibitor	inhibitor	substrate	substrate	no	medium
	14	0.0734274	4.367	35.6439	94.7462	inhibitor	0.431815	83.2973	inhibitor	inhibitor	non-inhibitor	inhibitor	no	medium
	15	0.458536	2.8327	18.9934	93.2126	non-inhibitor	0.0454653	86.6489	non-inhibitor	inhibitor	non-inhibitor	non-inhibitor	yes	medium
	16	0.940881	4.6712	51.1464	96.346	inhibitor	0.177202	85.1771	inhibitor	inhibitor	non-inhibitor	inh / sub	no	medium
	17	0.628415	4.1842	31.0434	96.2495	inhibitor	0.0812255	80.8622	non-inhibitor	inhibitor	non-inhibitor	inhibitor	yes	low
	18	0.0341495	4.8814	32.9099	96.4349	inhibitor	0.0422992	87.2504	non-inhibitor	inhibitor	non-inhibitor	inhibitor	no	medium
	19	0.0517329	5.0558	39.5278	96.061	inhibitor	1.75771	83.1552	non-inhibitor	inhibitor	substrate	substrate	no	medium
	20	26.2858	3.9433	54.8256	96.7098	inhibitor	0.117619	81.13	non-inhibitor	inhibitor	substrate	non-inhibitor	no	medium
	21	1.25439	2.3767	34.1805	97.8658	inhibitor	0.140663	60.9874	non-inhibitor	inhibitor	inh / sub	non-inhibitor	yes	medium
	22	2.52684	2.4568	51.0599	94.5806	inhibitor	0.102081	55.978	inhibitor	non-inhibitor	non-inhibitor	inh / sub	yes	medium
	23	0.0252052	4.1298	24.2762	95.0107	inhibitor	1.24461	99.5348	inhibitor	inhibitor	non-inhibitor	substrate	no	high
	24	0.0475058	4.0397	23.391	95.2611	inhibitor	0.0179541	90.225	non-inhibitor	inhibitor	non-inhibitor	non-inhibitor	yes	medium

## Sheet: vNN
	Entry	Stability	1A2	3A4	2D6	2C9	2C19	BBB	P-gp	hERG	Ames
	1	no	out	out	out	out	out	out	inh / subs	yes	out
	2	out	inh	inh	no-inh	no-inh	no-inh	out	no-inh / no-sub	yes	out
	3	out	inh	inh	no-inh	no-inh	no-inh	out	inh	yes	out
	4	out	out	out	out	out	out	out	out	out	out
	5	yes	out	out	out	out	out	out	out	yes	out
	6	out	out	out	out	out	out	out	no-sub	out	out
	7	out	out	inh	out	out	out	out	sub	out	out
	8	out	out	out	out	out	out	out	inh / subs	yes	out
	9	out	inh	inh	no-inh	no-inh	no-inh	out	inh	yes	out
	10	out	out	out	out	out	out	out	out	out	out
	11	out	out	out	out	out	out	out	out	out	out
	12	out	out	out	out	out	out	out	out	out	out
	13	out	out	out	out	out	out	out	sub	yes	out
	14	out	out	out	out	out	out	out	out	out	out
	15	out	out	out	out	out	out	out	out	yes	out
	16	out	out	out	out	out	out	out	out	out	out
	17	out	out	out	out	out	out	out	out	out	out
	18	out	out	out	out	out	out	out	out	out	out
	19	out	inh	inh	no-inh	no-inh	no-inh	out	out	no	out
	20	out	out	out	out	out	out	out	out	out	out
	21	out	out	out	out	out	out	out	out	out	out
	22	out	out	out	out	out	out	out	out	out	out
	23	out	out	out	out	out	out	out	out	out	out
	24	out	out	out	out	out	out	out	out	out	out

## Sheet: SwissADMET
	Entry	iLOGP	XLOGP3	WLOGP	MLOGP	Silicos-IT Log P	Log P	ESOL Log S	ESOL Solubility (mg/ml)	ESOL Solubility (mol/l)	ESOL Class	Ali Log S	Ali Solubility (mg/ml)	Ali Solubility (mol/l)	Ali Class	Silicos-IT LogSw	Silicos-IT Solubility (mg/ml)	Silicos-IT Solubility (mol/l)	Silicos-IT class	GI absorption	BBB permeant	Pgp substrate	CYP1A2 inhibitor	CYP2C19 inhibitor	CYP2C9 inhibitor	CYP2D6 inhibitor	CYP3A4 inhibitor
	1	4.04	3.52	3.49	2.15	3.69	3.38	-5.07	0.0042	8.51e-06	Moderately soluble	-5.02	0.00476	9.64e-06	Moderately soluble	-9.67	1.05e-07	2.12e-10	Poorly soluble	High	No	Yes	No	Yes	Yes	Yes	Yes
	2	4.04	4.11	4.32	2.82	4.31	3.92	-5.05	0.00395	8.83e-06	Moderately soluble	-5.26	0.00246	5.5e-06	Moderately soluble	-7.94	5.14e-06	1.15e-08	Poorly soluble	High	Yes	No	No	Yes	Yes	Yes	Yes
	3	3.67	3.31	3.48	1.48	4.06	3.2	-4.11	0.0303	7.71e-05	Moderately soluble	-4.56	0.011	2.78e-05	Moderately soluble	-7.26	2.15e-05	5.46e-08	Poorly soluble	High	Yes	No	Yes	Yes	Yes	Yes	Yes
	4	3.42	4.07	6.32	2.91	3.78	4.1	-5.11	0.00362	7.79e-06	Moderately soluble	-5.71	0.000898	1.93e-06	Moderately soluble	-8.6	1.16e-06	2.5e-09	Poorly soluble	Low	No	No	Yes	Yes	Yes	Yes	Yes
	5	3.55	2.63	3.07	2.06	4.77	3.22	-3.72	0.0759	0.00019	Soluble	-3.9	0.0499	0.000125	Soluble	-7.35	1.76e-05	4.43e-08	Poorly soluble	High	Yes	Yes	No	Yes	No	Yes	Yes
	6	3.37	3.59	2.36	1.35	3.33	2.8	-4.98	0.0051	1.05e-05	Moderately soluble	-6.11	0.000382	7.83e-07	Poorly soluble	-6.88	6.46e-05	1.32e-07	Poorly soluble	High	No	No	No	Yes	Yes	Yes	Yes
	7	4.2	5.12	7.34	3.44	5.84	5.19	-6.44	0.00021	3.62e-07	Poorly soluble	-7.27	3.1e-05	5.33e-08	Poorly soluble	-12.49	1.9e-10	3.27e-13	Insoluble	Low	No	No	No	Yes	Yes	Yes	Yes
	8	3.36	4.9	7.32	2.75	4.83	4.63	-6.23	0.00031	5.86e-07	Poorly soluble	-6.69	0.000109	2.06e-07	Poorly soluble	-10.86	7.29e-09	1.38e-11	Insoluble	Low	No	No	No	Yes	Yes	Yes	Yes
	9	4.31	4.93	5.04	3.45	4.31	4.41	-5.89	0.00061	1.28e-06	Moderately soluble	-5.92	0.000576	1.21e-06	Moderately soluble	-8.03	4.43e-06	9.31e-09	Poorly soluble	High	Yes	No	Yes	Yes	Yes	Yes	No
	10	2.62	4.17	4.42	3.12	4.8	3.82	-5.02	0.00367	9.5e-06	Moderately soluble	-5.89	0.000494	1.28e-06	Moderately soluble	-8.09	3.11e-06	8.05e-09	Poorly soluble	High	No	No	Yes	Yes	Yes	Yes	Yes
	11	3.6	5.39	5.52	2.68	4.83	4.4	-6.13	0.000376	7.5e-07	Poorly soluble	-7.22	3.03e-05	6.04e-08	Poorly soluble	-9.65	1.13e-07	2.24e-10	Poorly soluble	High	No	Yes	No	Yes	Yes	Yes	Yes
	12	3.51	4.17	6.88	3.28	4.21	4.41	-5.27	0.00259	5.37e-06	Moderately soluble	-5.82	0.000735	1.52e-06	Moderately soluble	-8.86	6.63e-07	1.37e-09	Poorly soluble	Low	No	No	Yes	Yes	Yes	Yes	Yes
	13	4.27	3.64	4.62	2.43	3.82	3.76	-4.9	0.00611	1.26e-05	Moderately soluble	-5.19	0.00314	6.47e-06	Moderately soluble	-7.59	1.23e-05	2.54e-08	Poorly soluble	High	No	Yes	No	Yes	Yes	Yes	Yes
	14	3.55	4.3	3.28	2.09	4.26	3.5	-5.69	0.0011	2.05e-06	Moderately soluble	-6.14	0.000387	7.17e-07	Poorly soluble	-7.93	6.3e-06	1.17e-08	Poorly soluble	High	No	Yes	No	Yes	Yes	Yes	No
	15	2.68	2.75	3.82	2.1	2.7	2.81	-4.09	0.035	8.21e-05	Moderately soluble	-4.83	0.00629	1.47e-05	Moderately soluble	-6.84	6.16e-05	1.44e-07	Poorly soluble	High	No	Yes	Yes	Yes	Yes	Yes	Yes
	16	3.51	3.72	4.32	1.71	2.95	3.24	-4.98	0.00529	1.06e-05	Moderately soluble	-5.25	0.00281	5.62e-06	Moderately soluble	-8.23	2.96e-06	5.93e-09	Poorly soluble	High	No	Yes	No	Yes	Yes	Yes	Yes
	17	4.98	4.65	3.95	2.58	2.77	3.79	-6.2	0.000372	6.37e-07	Poorly soluble	-6.39	0.00024	4.12e-07	Poorly soluble	-8.71	1.14e-06	1.96e-09	Poorly soluble	High	No	Yes	No	Yes	No	Yes	No
	18	3.96	4.87	5.59	1.64	5.14	4.24	-5.98	0.000588	1.05e-06	Moderately soluble	-6.97	6.04e-05	1.08e-07	Poorly soluble	-10.15	3.92e-08	7.03e-11	Insoluble	Low	No	No	No	Yes	Yes	Yes	Yes
	19	4.39	4.43	5	3.49	4.39	4.34	-5.38	0.00198	4.21e-06	Moderately soluble	-5.82	0.000719	1.53e-06	Moderately soluble	-7.99	4.76e-06	1.01e-08	Poorly soluble	High	No	No	No	Yes	Yes	Yes	Yes
	20	4.23	3.17	4.18	1.62	3.25	3.29	-4.48	0.0147	3.29e-05	Moderately soluble	-4.46	0.0153	3.43e-05	Moderately soluble	-7.92	5.41e-06	1.21e-08	Poorly soluble	High	No	Yes	Yes	Yes	Yes	Yes	Yes
	21	3.68	1.86	2.16	2.37	1.18	2.25	-4.29	0.0254	5.09e-05	Moderately soluble	-3.71	0.0965	0.000193	Soluble	-6.88	6.56e-05	1.32e-07	Poorly soluble	High	No	Yes	No	No	Yes	Yes	Yes
	22	3.69	1.82	3.05	2.34	3.59	2.9	-3.93	0.0572	0.000117	Soluble	-3.19	0.318	0.000651	Soluble	-6.57	0.00013	2.67e-07	Poorly soluble	High	No	Yes	No	Yes	Yes	Yes	Yes
	23	3.1	4.12	5.52	4.06	4.15	4.19	-5.63	0.00119	2.34e-06	Moderately soluble	-5.68	0.00108	2.11e-06	Moderately soluble	-9.67	1.1e-07	2.15e-10	Poorly soluble	High	No	No	Yes	Yes	Yes	Yes	Yes
	24	3.67	4.03	5.26	2.51	3.5	3.79	-5.16	0.00317	6.97e-06	Moderately soluble	-6	0.000459	1.01e-06	Moderately soluble	-8.5	1.45e-06	3.18e-09	Poorly soluble	High	No	No	Yes	Yes	Yes	Yes	Yes
