# Supplementary material for: Evaluation of Free Online ADMET Tools for Academic or Small Biotech Environments
Source: Molecules. 2023 Jan 12;28(2):776. doi: 10.3390/molecules28020776 (PMC9864198; doi:10.3390/molecules28020776)
Supplement: Supplementary file 1 [file molecules-28-00776-s001.zip › Table S5 Comparisons and statistical analysis for each pharmacokinetic parameter.xlsx]

## Sheet: log S
						log S (calc)	log S	log S	log S	log S	log S	log S	log S
	INN	ID	Solubility (DB)	g/L (HMDB)	Molecular weight	Experimental	ADMETlab	FAF-Drug4	OCHEM	pkSCM	preADMET	SwissADMET	admetSAR
	Imatinib	STI571	very solube (pH<5.5)	0.0146	493.6	-4.52902	-3.287	-4.92	-4.4	-3.031	-5.6228	-5.07	-2.849
	Gefitinib	ZD1839	Sparingly soluble (pH<4)	0.027	446.91	-4.21886	-4.477	-4.58	-5	-4.124	-6.28546	-5.05	-3.595
	Erlotinib	OSI-1774	very slightly soluble (pH<2)	0.00891	393.44	-4.645	-4.667	-3.86	-4.1	-4.403	-5.53976	-4.11	-3.159
	Sorafenib	Bay43-9006	Insoluble	0.00171	464.09	-5.43361	-6.543	-5.17	-5.5	-5.089	-6.04833	-5.11	-4.579
	Sunitinib	SU11248	Soluble (1,2 <pH<6,8)	0.0308	398.48	-4.11186	-2.915	-3.65	-4.2	-4.164	-4.21947	-3.72	-3.217
	Dasatinib	BMS-354825	Very soluble	0.0128	488.01	-4.58122	-4.278	-4.87	-5	-3.073	-5.45746	-4.98	-3.764
	Lapatinib	GW572016	Soluble	0.0223	581.06	-4.41592	-4.072	-6.24		-4.324	-9.67318	-6.44	-3.647
	Nilotinib	AMN107	pH dependant (<4)	0.002031	529.52	-5.41617	-4.009	-6.1		-2.927	-6.74416	-6.23	-4.281
	Vandetanib	ZD-6474	Insoluble	0.008	475.36	-4.77393	-4.282	-4.92	-5.6	-4.919	-6.6035	-5.89	-3.65
	Axitinib	AG-013736	Insoluble	0.0002	486.47	-6.38603	-4.251	-4.87		-4.04	-6.22864	-5.02	-3.182
	Nintedanib	BIBF-1120	Insoluble	0.00966	539.64	-4.74713	-3.773	-5.58	-4.2	-4.492	-6.86625	-5.69	-3.392
						-4.8417	-4.23218	-4.97818	-4.75	-4.05327	-6.299	-5.21	-3.57409
	N=11					0.662198	0.922414	0.803291	0.604743	0.741768	1.34655	0.825857	0.506913
										ANOVA: Single Factor										Levene's Tests			TUKEY HSD/KRAMER			alpha	0.05							Pairwise t tests
																							group	mean	n	ss	df	q-crit
										DESCRIPTION					Alpha	0.05				type	p-value		Experimental	-4.8417	11	4.38506								group 1	group 2	p-value	mean
										Group	Count	Sum	Mean	Variance	SS	Std Err	Lower	Upper		means	0.750674		ADMETlab	-4.23218	11	8.50847								Experimental	ADMETlab	0.0917747	0.609521
										Experimental	11	-53.2587	-4.8417	0.438506	4.38506	0.254663	-5.3488	-4.33461		medians	0.784282		FAF-Drug4	-4.97818	11	6.45276								Experimental	FAF-Drug4	0.668531	0.136479
										ADMETlab	11	-46.554	-4.23218	0.850847	8.50847	0.254663	-4.73928	-3.72508		trimmed	0.750674		OCHEM	-4.75	8	2.56								Experimental	OCHEM	0.757968	0.0917031
										FAF-Drug4	11	-54.76	-4.97818	0.645276	6.45276	0.254663	-5.48528	-4.47108					pkSCM	-4.05327	11	5.5022								Experimental	pkSCM	0.0161635	0.78843
										OCHEM	8	-38	-4.75	0.365714	2.56	0.298618	-5.34463	-4.15537					preADMET	-6.299	11	18.132								Experimental	preADMET	0.00589513	1.4573
										pkSCM	11	-44.586	-4.05327	0.55022	5.5022	0.254663	-4.56037	-3.54617					SwissADMET	-5.21	11	6.8204								Experimental	SwissADMET	0.262766	0.368297
										preADMET	11	-69.289	-6.299	1.8132	18.132	0.254663	-6.8061	-5.7919					admetSAR	-3.57409	11	2.56961								Experimental	admetSAR	7.56513e-05	1.26761
										SwissADMET	11	-57.31	-5.21	0.68204	6.8204	0.254663	-5.7171	-4.7029							85	54.9305	77	4.40656						ADMETlab	FAF-Drug4	0.0569308	0.746
										admetSAR	11	-39.315	-3.57409	0.256961	2.56961	0.254663	-4.08119	-3.06699					Q TEST											ADMETlab	OCHEM	0.158325	0.517818
																							group 1	group 2	mean	std err	q-stat	lower	upper	p-value	mean-crit	Cohen d		ADMETlab	pkSCM	0.621882	0.178909
										ANOVA													Experimental	ADMETlab	0.609521	0.254663	2.39345	-0.512664	1.73171	0.692024	1.12219	0.721651		ADMETlab	preADMET	0.000556802	2.06682
										Sources	SS	df	MS	F	P value	Eta-sq	RMSSE	Omega Sq					Experimental	FAF-Drug4	0.136479	0.254663	0.53592	-0.985707	1.25866	0.999942	1.12219	0.161586		ADMETlab	SwissADMET	0.0165259	0.977818
										Between Groups	52.8805	7	7.55436	10.5895	2.95644e-09	0.490492	0.981164	0.441254					Experimental	OCHEM	0.0917031	0.277512	0.330447	-1.13117	1.31458	0.999998	1.22287	0.108573		ADMETlab	admetSAR	0.0551154	0.658091
										Within Groups	54.9305	77	0.713384										Experimental	pkSCM	0.78843	0.254663	3.09598	-0.333755	1.91062	0.369722	1.12219	0.933473		FAF-Drug4	OCHEM	0.489604	0.228182
										Total	107.811	84	1.28346										Experimental	preADMET	1.4573	0.254663	5.72247	0.335112	2.57948	0.00295896	1.12219	1.72539		FAF-Drug4	pkSCM	0.0109651	0.924909
																							Experimental	SwissADMET	0.368297	0.254663	1.44621	-0.753889	1.49048	0.969576	1.12219	0.43605		FAF-Drug4	preADMET	0.0128252	1.32082
																							Experimental	admetSAR	1.26761	0.254663	4.97761	0.145426	2.3898	0.0159188	1.12219	1.50081		FAF-Drug4	SwissADMET	0.512179	0.231818
																							ADMETlab	FAF-Drug4	0.746	0.254663	2.92937	-0.376186	1.86819	0.442381	1.12219	0.883237		FAF-Drug4	admetSAR	0.000137217	1.40409
																							ADMETlab	OCHEM	0.517818	0.277512	1.86593	-0.705055	1.74069	0.888717	1.22287	0.613078		OCHEM	pkSCM	0.0381016	0.696727
																							ADMETlab	pkSCM	0.178909	0.254663	0.702534	-0.943277	1.30109	0.999646	1.12219	0.211822		OCHEM	preADMET	0.00426236	1.549
																							ADMETlab	preADMET	2.06682	0.254663	8.11591	0.944634	3.18901	4.86858e-06	1.12219	2.44704		OCHEM	SwissADMET	0.179049	0.46
																							ADMETlab	SwissADMET	0.977818	0.254663	3.83966	-0.144368	2.1	0.133777	1.12219	1.1577		OCHEM	admetSAR	0.000570765	1.17591
																							ADMETlab	admetSAR	0.658091	0.254663	2.58417	-0.464095	1.78028	0.60384	1.12219	0.779156		pkSCM	preADMET	0.0001936	2.24573
																							FAF-Drug4	OCHEM	0.228182	0.277512	0.822241	-0.994692	1.45106	0.999009	1.22287	0.270159		pkSCM	SwissADMET	0.00252883	1.15673
																							FAF-Drug4	pkSCM	0.924909	0.254663	3.6319	-0.197277	2.04709	0.183788	1.12219	1.09506		pkSCM	admetSAR	0.0941648	0.479182
																							FAF-Drug4	preADMET	1.32082	0.254663	5.18655	0.198634	2.44301	0.01013	1.12219	1.5638		preADMET	SwissADMET	0.0356684	1.089
																							FAF-Drug4	SwissADMET	0.231818	0.254663	0.910295	-0.890368	1.354	0.998095	1.12219	0.274464		preADMET	admetSAR	3.05665e-05	2.72491
																							FAF-Drug4	admetSAR	1.40409	0.254663	5.51353	0.281905	2.52628	0.00483627	1.12219	1.66239		SwissADMET	admetSAR	3.48675e-05	1.63591
																							OCHEM	pkSCM	0.696727	0.277512	2.51062	-0.526146	1.9196	0.638343	1.22287	0.8249
																							OCHEM	preADMET	1.549	0.277512	5.58174	0.326128	2.77187	0.00412598	1.22287	1.83396
																							OCHEM	SwissADMET	0.46	0.277512	1.65758	-0.762874	1.68287	0.937414	1.22287	0.544623
																							OCHEM	admetSAR	1.17591	0.277512	4.23732	-0.0469645	2.39878	0.0682152	1.22287	1.39223
																							pkSCM	preADMET	2.24573	0.254663	8.81844	1.12354	3.36791	6.13902e-07	1.12219	2.65886
																							pkSCM	SwissADMET	1.15673	0.254663	4.54219	0.0345415	2.27891	0.0385868	1.12219	1.36952
																							pkSCM	admetSAR	0.479182	0.254663	1.88163	-0.643004	1.60137	0.884323	1.12219	0.567334
																							preADMET	SwissADMET	1.089	0.254663	4.27625	-0.0331846	2.21119	0.0635858	1.12219	1.28934
																							preADMET	admetSAR	2.72491	0.254663	10.7001	1.60272	3.8471	1.92878e-09	1.12219	3.2262
																							SwissADMET	admetSAR	1.63591	0.254663	6.42383	0.513723	2.75809	0.000517301	1.12219	1.93686

## Sheet: log P
				Experimental
			INN	LogP (HSDB)	ADMETlab 2.0	FAF-Drug4	OCHEM	pkSCM	preADMET	SwissADMET	admetSAR
		1	Imatinib	3	3.805	3.52	3.9	4.59	4.2205	3.38	4.59			ANOVA: Single Factor										Kruskal-Wallis Test
		2	Gefitinib	3.2	3.822	3.63	3.3	4.28	4.2033	3.92	4.28
		3	Erlotinib	2.7	2.497	3.19	3.1	3.4	4.3099	3.2	3.41			DESCRIPTION					Alpha	0.05					LogP (HSDB)	ADMETlab 2.0	FAF-Drug4	OCHEM	pkSCM	preADMET	SwissADMET	admetSAR
		4	Sorafenib	3.8	5.103	4.07	3.9	5.55	4.1758	4.1	5.55			Group	Count	Sum	Mean	Variance	SS	Std Err	Lower	Upper		median	3.92	3.822	3.95	3.6	5.004	4.2033	3.79	5
		5	Sunitinib	5.2	3.112	2.63	2.6	3.33	2.8911	3.22	3.33			LogP (HSDB)	15	60.44	4.02933	1.37396	19.2355	0.228154	3.57718	4.48148		rank sum	853.5	750	759	513.5	1204	994	735.5	1211.5
		6	Dasatinib	1.8	2.807	3.59	3.6	3.31	3.4393	2.8	3.31			ADMETlab 2.0	15	57.757	3.85047	0.713396	9.98755	0.228154	3.39832	4.30262		count	15	15	15	13	15	15	15	15	118
		7	Lapatinib	5.4	4.307	5.12		6.139	6.0417	5.19	6.14			FAF-Drug4	15	58.12	3.87467	0.507412	7.10377	0.228154	3.42252	4.32682		r^2/n	48564.2	37500	38405.4	20283.2	96641.1	65869.1	36064	97848.8	441176
		8	Nilotinib	5.01	4.894	4.9		6.35	5.0842	4.63	6.36			OCHEM	13	47.1	3.62308	0.411923	4.94308	0.245077	3.13739	4.10876		H-stat									20.0196
		9	Vandetanib	5	4.281	3.67	4	5.004	5.0874	4.41	5			pkSCM	15	71.5082	4.76721	1.00368	14.0515	0.228154	4.31506	5.21936		H-ties									20.0218
		14	Nintedanib	3	3.466	4.3	3.3	4.0394	4.367	3.5	4.04			preADMET	15	64.0624	4.27083	0.703682	9.85155	0.228154	3.81868	4.72298		df									7
		15	Lenvatinib	3.3	3.137	2.75	3	4.07	2.8327	2.81	4.07			SwissADMET	15	57.27	3.818	0.462817	6.47944	0.228154	3.36585	4.27015		p-value									0.0055228
		17	Brigatinib	5.17	3.009	4.65	4.6	5.09	4.1842	3.79	5.09			admetSAR	15	71.64	4.776	1.01695	14.2374	0.228154	4.32385	5.22815		alpha									0.05
		19	Dacomitinib	3.92	4.275	3.95	4.1	5.1551	5.0558	4.34	5.16													sig									yes
		23	Ripretinib	5.63	5.227	4.12	4.7	5.6707	4.1298	4.19	5.67			ANOVA
		24	Tivozanib	4.31	4.015	4.03	3	5.53	4.0397	3.79	5.64			Sources	SS	df	MS	F	P value	Eta-sq	RMSSE	Omega Sq
				4.02933	3.85047	3.87467	3.62308	4.76721	4.27083	3.818	4.776			Between Groups	19.748	7	2.82114	3.61307	0.0015297	0.186941	0.497143	0.134209
		N=15		1.17216	0.844628	0.712329	0.641812	1.00184	0.838857	0.680307	1.00844			Within Groups	85.8898	110	0.780816
														Total	105.638	117	0.902887
														ANOVA: Single Factor										TUKEY HSD/KRAMER			alpha	0.05			Levene's Tests
																								group	mean	n	ss	df	q-crit
														DESCRIPTION					Alpha	0.05				LogP (HSDB)	4.02933	15	19.2355				type	p-value
														Group	Count	Sum	Mean	Variance	SS	Std Err	Lower	Upper		ADMETlab 2.0	3.85047	15	9.98755				means	0.0438708
														LogP (HSDB)	15	60.44	4.02933	1.37396	19.2355	0.228154	3.57718	4.48148		FAF-Drug4	3.87467	15	7.10377				medians	0.0885248
														ADMETlab 2.0	15	57.757	3.85047	0.713396	9.98755	0.228154	3.39832	4.30262		OCHEM	3.62308	13	4.94308				trimmed	0.0438708
														FAF-Drug4	15	58.12	3.87467	0.507412	7.10377	0.228154	3.42252	4.32682		pkSCM	4.76721	15	14.0515
														OCHEM	13	47.1	3.62308	0.411923	4.94308	0.245077	3.13739	4.10876		preADMET	4.27083	15	9.85155
														pkSCM	15	71.5082	4.76721	1.00368	14.0515	0.228154	4.31506	5.21936		SwissADMET	3.818	15	6.47944
														preADMET	15	64.0624	4.27083	0.703682	9.85155	0.228154	3.81868	4.72298		admetSAR	4.776	15	14.2374
														SwissADMET	15	57.27	3.818	0.462817	6.47944	0.228154	3.36585	4.27015				118	85.8898	110	4.37009
														admetSAR	15	71.64	4.776	1.01695	14.2374	0.228154	4.32385	5.22815
														ANOVA
														Sources	SS	df	MS	F	P value	Eta-sq	RMSSE	Omega Sq
														Between Groups	19.748	7	2.82114	3.61307	0.0015297	0.186941	0.497143	0.134209
														Within Groups	85.8898	110	0.780816
														Total	105.638	117	0.902887
																									Pairwise t tests
														Q TEST
														group 1	group 2	mean	std err	q-stat	lower	upper	p-value	mean-crit	Cohen d		group 1	group 2	p-value	mean
														LogP (HSDB)	ADMETlab 2.0	0.178867	0.228154	0.783972	-0.818189	1.17592	0.999292	0.997055	0.202421		LogP (HSDB)	ADMETlab 2.0	0.635687	0.178867
														LogP (HSDB)	FAF-Drug4	0.154667	0.228154	0.677904	-0.842389	1.15172	0.999729	0.997055	0.175034		LogP (HSDB)	FAF-Drug4	0.666369	0.154667
														LogP (HSDB)	OCHEM	0.406256	0.236767	1.71585	-0.628437	1.44095	0.926381	1.03469	0.459754		LogP (HSDB)	OCHEM	0.259527	0.406256
														LogP (HSDB)	pkSCM	0.73788	0.228154	3.23413	-0.259175	1.73494	0.310272	0.997055	0.835048		LogP (HSDB)	pkSCM	0.0746545	0.73788
														LogP (HSDB)	preADMET	0.241493	0.228154	1.05846	-0.755562	1.23855	0.99521	0.997055	0.273294		LogP (HSDB)	preADMET	0.522249	0.241493
														LogP (HSDB)	SwissADMET	0.211333	0.228154	0.926274	-0.785722	1.20839	0.997925	0.997055	0.239163		LogP (HSDB)	SwissADMET	0.551941	0.211333
														LogP (HSDB)	admetSAR	0.746667	0.228154	3.27264	-0.250389	1.74372	0.295537	0.997055	0.844992		LogP (HSDB)	admetSAR	0.0721782	0.746667
														ADMETlab 2.0	FAF-Drug4	0.0242	0.228154	0.106069	-0.972855	1.02126	1	0.997055	0.0273868		ADMETlab 2.0	FAF-Drug4	0.933019	0.0242
														ADMETlab 2.0	OCHEM	0.22739	0.236767	0.960395	-0.807303	1.26208	0.99739	1.03469	0.257334		ADMETlab 2.0	OCHEM	0.426669	0.22739
														ADMETlab 2.0	pkSCM	0.916747	0.228154	4.0181	-0.0803086	1.9138	0.0954998	0.997055	1.03747		ADMETlab 2.0	pkSCM	0.0115143	0.916747
														ADMETlab 2.0	preADMET	0.42036	0.228154	1.84244	-0.576695	1.41742	0.895997	0.997055	0.475715		ADMETlab 2.0	preADMET	0.182305	0.42036
														ADMETlab 2.0	SwissADMET	0.0324667	0.228154	0.142301	-0.964589	1.02952	1	0.997055	0.036742		ADMETlab 2.0	SwissADMET	0.908564	0.0324667
														ADMETlab 2.0	admetSAR	0.925533	0.228154	4.05661	-0.0715219	1.92259	0.0892682	0.997055	1.04741		ADMETlab 2.0	admetSAR	0.011112	0.925533
														FAF-Drug4	OCHEM	0.25159	0.236767	1.0626	-0.783103	1.28628	0.995094	1.03469	0.28472		FAF-Drug4	OCHEM	0.334714	0.25159
														FAF-Drug4	pkSCM	0.892547	0.228154	3.91203	-0.104509	1.8896	0.1145	0.997055	1.01008		FAF-Drug4	pkSCM	0.00938188	0.892547
														FAF-Drug4	preADMET	0.39616	0.228154	1.73637	-0.600895	1.39322	0.921907	0.997055	0.448328		FAF-Drug4	preADMET	0.174506	0.39616
														FAF-Drug4	SwissADMET	0.0566667	0.228154	0.24837	-0.940389	1.05372	1	0.997055	0.0641288		FAF-Drug4	SwissADMET	0.825304	0.0566667
														FAF-Drug4	admetSAR	0.901333	0.228154	3.95054	-0.0957219	1.89839	0.10728	0.997055	1.02003		FAF-Drug4	admetSAR	0.00906698	0.901333
														OCHEM	pkSCM	1.14414	0.236767	4.83233	0.109443	2.17883	0.0193923	1.03469	1.2948		OCHEM	pkSCM	0.00128336	1.14414
														OCHEM	preADMET	0.64775	0.236767	2.73581	-0.386943	1.68244	0.530575	1.03469	0.733049		OCHEM	preADMET	0.029173	0.64775
														OCHEM	SwissADMET	0.194923	0.236767	0.82327	-0.83977	1.22962	0.999027	1.03469	0.220592		OCHEM	SwissADMET	0.442817	0.194923
														OCHEM	admetSAR	1.15292	0.236767	4.86944	0.11823	2.18762	0.0178928	1.03469	1.30475		OCHEM	admetSAR	0.00125114	1.15292
														pkSCM	preADMET	0.496387	0.228154	2.17566	-0.500669	1.49344	0.784921	0.997055	0.561753		pkSCM	preADMET	0.152701	0.496387
														pkSCM	SwissADMET	0.949213	0.228154	4.1604	-0.0478419	1.94627	0.0741171	0.997055	1.07421		pkSCM	SwissADMET	0.00559445	0.949213
														pkSCM	admetSAR	0.00878667	0.228154	0.0385119	-0.988269	1.00584	1	0.997055	0.00994374		pkSCM	admetSAR	0.98107	0.00878667
														preADMET	SwissADMET	0.452827	0.228154	1.98474	-0.544229	1.44988	0.853886	0.997055	0.512457		preADMET	SwissADMET	0.116098	0.452827
														preADMET	admetSAR	0.505173	0.228154	2.21417	-0.491882	1.50223	0.769467	0.997055	0.571697		preADMET	admetSAR	0.147363	0.505173
														SwissADMET	admetSAR	0.958	0.228154	4.19891	-0.0390553	1.95506	0.0690696	0.997055	1.08415		SwissADMET	admetSAR	0.00541904	0.958

## Sheet: Absorption
			Experimental	ADMETlab 2.0		FAF-Drug4	pkSCM		preADMET		SwissADMET	admetSAR					Experimental	ADMETlab 2.0		FAF-Drug4	pkSCM		preADMET		SwissADMET	admetSAR
		INN	Absorption	Caco-2 (log cm/s)	HIA+ (prob)	Oral bioavailability	Caco2 (log cm/s)	HIA (%)	Caco2 (nm/sec)	HIA (%)	GI absorption	Caco-2	HIA			INN	Absorption	Caco-2 (log cm/s)	HIA+ (prob)	Oral bioavailability	Caco2 (log cm/s)	HIA (%)	Caco2 (nm/sec)	HIA (%)	GI absorption	Caco-2	HIA
	1	Imatinib	Absolute bioavailability (98%)	High	High	High	High	High	Low	High	High	High	High		1	Imatinib	1	1	1	1	1	1	0	1	1	1	1
	2	Gefitinib	Slowly absorption (60%)	Low	High	High	High	High	Low	High	High	Low	High		2	Gefitinib	1	0	1	1	1	1	0	1	1	0	1
	3	Erlotinib	Slowly absorption (60-100%)	Low	High	High	High	High	Low	High	High	Low	High		3	Erlotinib	1	0	1	1	1	1	0	1	1	0	1
	4	Sorafenib	Slow absorption (38-49%)	High	High	High	High	High	Low	High	Low	High	High		4	Sorafenib	0	1	1	1	1	1	0	1	0	1	1
	5	Sunitinib	High bioavailability (50%)	High	High	High	High	High	Low	High	High	Low	High		5	Sunitinib	0	1	1	1	1	1	0	1	1	0	1
	6	Dasatinib	High bioavailability (81%)	Low	High	High	Low	High	Low	High	High	High	High		6	Dasatinib	1	0	1	1	0	1	0	1	1	1	1
	7	Lapatinib	Incomplete and variable	High	High	High	Low	High	Low	High	Low	High	High		7	Lapatinib	0	1	1	1	0	1	0	1	0	1	1
	8	Nilotinib	Increased with food	High	High	High	High	High	Low	High	Low	High	High		8	Nilotinib	0	1	1	1	1	1	0	1	0	1	1
	9	Vandetanib	High (50-90%)	High	High	High	High	High	Low	High	High	Low	High		9	Vandetanib	1	1	1	1	1	1	0	1	1	0	1
	10	Axitinib	High bioavailability	High	High	High	High	High	Low	High	High	Low	High		10	Axitinib	1	1	1	1	1	1	0	1	1	0	1
	11	Cabozantinib	High bioavailability	Low	High	High	Low	High	Low	High	High	High	High		11	Cabozantinib	1	0	1	1	0	1	0	1	1	1	1
	12	Regorafenib	Moderate bioavailability (69-83%)	High	High	High	Low	High	Low	High	Low	High	High		12	Regorafenib	1	1	1	1	0	1	0	1	0	1	1
	13	Afatinib	Bioavailability up to 92%	Low	High	High	High	High	Low	High	High	Low	High		13	Afatinib	1	0	1	1	1	1	0	1	1	0	1
	14	Nintedanib	Very low bioavailability (4,7%)	High	Low	High	Low	High	Low	High	High	High	High		14	Nintedanib	0	1	0	1	0	1	0	1	1	1	1
	15	Lenvatinib	High bioavailability	High	High	High	Low	High	Low	High	High	High	High		15	Lenvatinib	1	1	1	1	0	1	0	1	1	1	1
	16	Osimertinib	Moderate bioavailability	High	High	High	High	High	Low	High	High	High	High		16	Osimertinib	0	1	1	1	1	1	0	1	1	1	1
	17	Brigatinib	Low bioavailability	Low	High	High	High	High	Low	High	High	High	High		17	Brigatinib	0	0	1	1	1	1	0	1	1	1	1
	18	Neratinib	Moderate bioavailability (65-71%)	High	High	High	Low	High	Low	High	Low	High	High		18	Neratinib	1	1	1	1	0	1	0	1	0	1	1
	19	Dacomitinib	High bioavailability (80%)	High	High	High	Low	High	Low	High	High	High	High		19	Dacomitinib	1	1	1	1	0	1	0	1	1	1	1
	20	Erdafitinib	Moderate bioavailability (51-65%)	Low	High	High	High	High	Low	High	High	Low	High		20	Erdafitinib	0	0	1	1	1	1	0	1	1	0	1
	21	Avapritinib	Moderate bioavailability	Low	High	High	High	High	Low	High	High	High	High		21	Avapritinib	0	0	1	1	1	1	0	1	1	1	1
	22	Pemigatinib	Low bioavailability	High	High	High	High	High	Low	High	High	Low	High		22	Pemigatinib	0	1	1	1	1	1	0	1	1	0	1
	23	Ripretinib	High bioavailability	High	High	High	High	High	Low	High	High	Low	High		23	Ripretinib	1	1	1	1	1	1	0	1	1	0	1
	24	Tivozanib	High bioavailability	High	High	High	Low	High	Low	High	High	Low	High		24	Tivozanib	1	1	1	1	0	1	0	1	1	0	1
		INN	Experimental	ADMETlab	admetSAR	FAF-Drug4	pkCSM	SwissADMET
	1	Imatinib	1	1	1	1	1	1
	2	Gefitinib	1	1	1	1	1	1
	3	Erlotinib	1	1	1	1	1	1
	4	Sorafenib	0	1	1	1	1	0
	5	Sunitinib	0	1	1	1	1	1
	6	Dasatinib	1	1	1	1	1	1
	7	Lapatinib	0	1	1	1	1	0
	8	Nilotinib	0	1	1	1	1	0
	9	Vandetanib	1	1	1	1	1	1
	10	Axitinib	1	1	1	1	1	1
	11	Cabozantinib	1	1	1	1	1	1
	12	Regorafenib	1	1	1	1	1	0
	13	Afatinib	1	1	1	1	1	1
	14	Nintedanib	0	0	1	1	1	1
	15	Lenvatinib	1	1	1	1	1	1
	16	Osimertinib	0	1	1	1	1	1
	17	Brigatinib	0	1	1	1	1	1
	18	Neratinib	1	1	1	1	1	0
	19	Dacomitinib	1	1	1	1	1	1
	20	Erdafitinib	0	1	1	1	1	1
	21	Avapritinib	0	1	1	1	1	1
	22	Pemigatinib	0	1	1	1	1	1
	23	Ripretinib	1	1	1	1	1	1
	24	Tivozanib	1	1	1	1	1	1
		Mean	0.583333	0.958333	1	1	1	0.791667
		SD	0.50361	0.204124	0	0	0	0.414851
			ANOVA: Single Factor										Kruskal-Wallis Test									Levene's Tests			Pairwise t tests
			DESCRIPTION					Alpha	0.05					Experimental	ADMETlab	admetSAR	FAF-Drug4	pkCSM	SwissADMET			type	p-value		group 1	group 2	p-value	mean
			Group	Count	Sum	Mean	Variance	SS	Std Err	Lower	Upper		median	1	1	1	1	1	1			means	0		Experimental	ADMETlab	0.00200351	0.375
			Experimental	24	14	0.583333	0.253623	5.83333	0.0569717	0.470683	0.695984		rank sum	1212	1860	1932	1932	1932	1572			medians	2.33717e-07		Experimental	admetSAR	0.000492867	0.416667
			ADMETlab	24	23	0.958333	0.0416667	0.958333	0.0569717	0.845683	1.07098		count	24	24	24	24	24	24	144		trimmed	0		Experimental	FAF-Drug4	0.000492867	0.416667
			admetSAR	24	24	1	0	0	0.0569717	0.88735	1.11265		r^2/n	61206	144150	155526	155526	155526	102966	774900					Experimental	pkCSM	0.000492867	0.416667
			FAF-Drug4	24	24	1	0	0	0.0569717	0.88735	1.11265		H-stat							10.3448					Experimental	SwissADMET	0.124869	0.208333
			pkCSM	24	24	1	0	0	0.0569717	0.88735	1.11265		H-ties							34.9121					ADMETlab	admetSAR	0.327716	0.0416667
			SwissADMET	24	19	0.791667	0.172101	3.95833	0.0569717	0.679016	0.904317		df							5					ADMETlab	FAF-Drug4	0.327716	0.0416667
													p-value							1.56666e-06					ADMETlab	pkCSM	0.327716	0.0416667
			ANOVA										alpha							0.05					ADMETlab	SwissADMET	0.0865088	0.166667
			Sources	SS	df	MS	F	P value	Eta-sq	RMSSE	Omega Sq		sig							yes					admetSAR	FAF-Drug4	#DIV/0!	0
			Between Groups	3.47222	5	0.694444	8.91473	2.33717e-07	0.244141	0.609465	0.215574														admetSAR	pkCSM	#DIV/0!	0
			Within Groups	10.75	138	0.0778986																			admetSAR	SwissADMET	0.0218223	0.208333
			Total	14.2222	143	0.0994561																			FAF-Drug4	pkCSM	#DIV/0!	0
																									FAF-Drug4	SwissADMET	0.0218223	0.208333
																									pkCSM	SwissADMET	0.0218223	0.208333

## Sheet: Distribution
			Plasma Protein Binding (%)							ADMETlab 2.0	pkSCM	preADMET	SwissADMET	admetSAR
		INN	Experimental	ADMETlab 2.0	preADMET	admetSAR			INN	BBB+ (Prob.)	BBB (log BB)	BBB (c.brain/c.blood)	BBB permeant	BBB (prob)			INN	ADMETlab 2.0	pkSCM	preADMET	SwissADMET	admetSAR
	1	Imatinib	95	90.3869	85.5999	100		1	Imatinib	0.977	-1.376	0.0817968	No	0.9906		1	Imatinib	0	1	0	0	1
	2	Gefitinib	90	95.5953	80.73	92.6		2	Gefitinib	0.578	-0.738	0.0476259	Yes	0.9909		2	Gefitinib	0	1	0	1	1
	3	Erlotinib	93	91.2217	93.1511	99		3	Erlotinib	0.2	-0.67	0.0416394	Yes	0.9778		3	Erlotinib	1	1	0	1	1
	4	Sorafenib	100	98.3765	89.8652	100		4	Sorafenib	0.512	-1.642	1.00027	No	0.9781		4	Sorafenib	0	1	1	0	1
	5	Sunitinib	92	91.4088	64.2213	75.8		5	Sunitinib	0.463	-0.9	0.908823	Yes	0.9752		5	Sunitinib	0	1	0	1	1
	6	Dasatinib	96	93.9494	70.2529	93.9		6	Dasatinib	0.816	-1.53	0.0350358	No	0.9665		6	Dasatinib	0	1	0	0	1
	7	Lapatinib	99	95.6019	97.564	100		7	Lapatinib	0.043	-0.785	0.0313863	No	0.9738		7	Lapatinib	1	1	0	0	1
	8	Nilotinib	98	98.0359	92.5801	99		8	Nilotinib	0.016	-1.152	0.0371764	No	0.9772		8	Nilotinib	1	1	0	0	1
	9	Vandetanib	90	91.0927	82.8887	97.3		9	Vandetanib	0.972	-0.264	0.63581	Yes	0.9925		9	Vandetanib	0	0	0	1	1
	10	Axitinib	99	97.8081	93.1129	98		10	Axitinib	0.597	-1.087	1.00568	No	0.978		10	Axitinib	0	1	1	0	1
	11	Cabozantinib	99.7	97.7425	89.2871	100		11	Cabozantinib	0.041	-0.574	0.0359432	No	0.9656		11	Cabozantinib	1	1	0	0	1
	12	Regorafenib	100	9.89741	91.051	100		12	Regorafenib	0.196	-1.804	1.31554	No	0.9781		12	Regorafenib	1	1	1	0	1
	13	Afatinib	95	9.03006	79.5061	99		13	Afatinib	0.792	-1.384	0.189383	No	0.9738		13	Afatinib	0	1	0	0	1
	14	Nintedanib	98	9.47907	83.2973	89.1		14	Nintedanib	0.883	-1.012	0.431815	No	0.8694		14	Nintedanib	0	1	0	0	1
	15	Lenvatinib	99	0.0960688	86.6489	100		15	Lenvatinib	0.503	-1.342	0.0454653	No	0.9743		15	Lenvatinib	0	1	0	0	1
	16	Osimertinib	90	87.1238	85.1771	88.3		16	Osimertinib	0.867	-1.129	0.177202	No	0.9717		16	Osimertinib	0	1	0	0	1
	17	Brigatinib	66	63.9684	80.8622	100		17	Brigatinib	0.748	-1.179	0.0812255	No	0.9812		17	Brigatinib	0	1	0	0	1
	18	Neratinib	99	9.77207	87.2504	100		18	Neratinib	0.048	-1.666	0.0422992	No	0.9764		18	Neratinib	1	1	0	0	1
	19	Dacomitinib	98	96.3147	83.1552	97.23		19	Dacomitinib	0.751	-1.476	1.75771	No	0.9868		19	Dacomitinib	0	1	1	0	1
	20	Erdafitinib	100	88.1188	81.13	82.6		20	Erdafitinib	0.237	-1.032	0.117619	No	0.9889		20	Erdafitinib	1	1	0	0	1
	21	Avapritinib	99	91.9144	60.9874	97.9		21	Avapritinib	0.366	-1.528	0.140663	No	0.9888		21	Avapritinib	0	1	0	0	1
	22	Pemigatinib	91	0.828416	55.978	51.7		22	Pemigatinib	0.851	-2.068	0.102081	No	0.9813		22	Pemigatinib	0	1	0	0	1
	23	Ripretinib	99	97.1564	99.5348	99.4		23	Ripretinib	0.757	-1.316	1.24461	No	0.9855		23	Ripretinib	0	1	1	0	1
	24	Tivozanib	99	9.92379	90.225	89.1		24	Tivozanib	0.041	-0.6006	0.0179541	No	0.9743		24	Tivozanib	1	1	0	0	1
		Mean	95.1958	67.2851	83.5024	93.7471											Mean	0.333333	0.958333	0.208333	0.166667	1
		SD	7.16625	40.1513	10.9912	10.9864											SD	0.481543	0.204124	0.414851	0.380693	0
		Plasma Protein Binding (PPB)
		ANOVA: Single Factor										Kruskal-Wallis Test							Levene's Tests			Pairwise t tests
		DESCRIPTION					Alpha	0.05					Experimental	ADMETlab 2.0	preADMET	admetSAR			type	p-value		group 1	group 2	p-value	mean
		Group	Count	Sum	Mean	Variance	SS	Std Err	Lower	Upper		median	98	91.1572	85.3885	98.5			means	0		Experimental	ADMETlab 2.0	0.0026024	27.9107
		Experimental	24	2284.7	95.1958	51.3552	1181.17	4.45462	86.3486	104.043		rank sum	1529	865	725	1537			medians	0.000137633		Experimental	preADMET	8.83961e-05	11.6935
		ADMETlab 2.0	24	1614.84	67.2851	1612.13	37079	4.45462	58.4379	76.1324		count	24	24	24	24	96		trimmed	2.22045e-16		Experimental	admetSAR	0.591484	1.44875
		preADMET	24	2004.06	83.5024	120.806	2778.53	4.45462	74.6551	92.3496		r^2/n	97410	31176	21901	98432	248919					ADMETlab 2.0	preADMET	0.0672447	16.2172
		admetSAR	24	2249.93	93.7471	120.701	2776.13	4.45462	84.8998	102.594		H-stat					29.7721					ADMETlab 2.0	admetSAR	0.004401	26.462
												H-ties					29.8533					preADMET	admetSAR	0.00229076	10.2447
		ANOVA										df					3
		Sources	SS	df	MS	F	P value	Eta-sq	RMSSE	Omega Sq		p-value					1.48166e-06
		Between Groups	11916.2	3	3972.06	8.34033	5.78863e-05	0.213816	0.589503	0.186585		alpha					0.05
		Within Groups	43814.8	92	476.248							sig					yes
		Total	55731	95	586.642
		Blood brain barrier (BBB)
		ANOVA: Single Factor										Kruskal-Wallis Test								Levene's Tests			Pairwise t tests
		DESCRIPTION					Alpha	0.05					ADMETlab 2.0	pkSCM	preADMET	SwissADMET	admetSAR			type	p-value		group 1	group 2	p-value	mean
		Group	Count	Sum	Mean	Variance	SS	Std Err	Lower	Upper		median	0	1	0	0	1			means	2.05169e-13		ADMETlab 2.0	pkSCM	1.85761e-06	0.625
		ADMETlab 2.0	24	8	0.333333	0.231884	5.33333	0.0701534	0.194373	0.472294		rank sum	1164	2064	984	924	2124			medians	0.00794975		ADMETlab 2.0	preADMET	0.340465	0.125
		pkSCM	24	23	0.958333	0.0416667	0.958333	0.0701534	0.819373	1.09729		count	24	24	24	24	24	120		trimmed	5.34894e-12		ADMETlab 2.0	SwissADMET	0.190382	0.166667
		preADMET	24	5	0.208333	0.172101	3.95833	0.0701534	0.069373	0.347294		r^2/n	56454	177504	40344	35574	187974	497850					ADMETlab 2.0	admetSAR	6.44449e-07	0.666667
		SwissADMET	24	4	0.166667	0.144928	3.33333	0.0701534	0.0277063	0.305627		H-stat						48.4463					pkSCM	preADMET	3.25556e-09	0.75
		admetSAR	24	24	1	0	0	0.0701534	0.86104	1.13896		H-ties						64.8789					pkSCM	SwissADMET	1.24365e-10	0.791667
												df						4					pkSCM	admetSAR	0.327716	0.0416667
		ANOVA										p-value						2.72888e-13					preADMET	SwissADMET	0.718628	0.0416667
		Sources	SS	df	MS	F	P value	Eta-sq	RMSSE	Omega Sq		alpha						0.05					preADMET	admetSAR	2.6813e-09	0.791667
		Between Groups	16.2833	4	4.07083	34.4647	6.83107e-19	0.545201	1.19834	0.527296		sig						yes					SwissADMET	admetSAR	2.01277e-10	0.833333
		Within Groups	13.5833	115	0.118116
		Total	29.8667	119	0.25098

## Sheet: Clearance
			Experimental	ADMETlab 2.0		pkSCM						Experimental	ADMETlab 2.0
		INN	Clearance (L/h)	Cl (mL/min/kg)	Cl (L/h)	Cl (log mL/min/kg)	Cl (mL/min/kg)	Cl (L/h)			INN	t1/2	t1/2 <3 (Prob.)	Category
			Experimental		ADMETlab 2.0			pkSCM
	1	Imatinib	11.8	8.295	34.839	0.716	5.19996	21.8398		1	Imatinib	18	0.107	Good	1
	2	Gefitinib	35.7	8.197	34.4274	0.937	8.64968	36.3287		2	Gefitinib	48	0.107	Good	1
	3	Erlotinib	5.3	10.125	42.525	0.591	3.89942	16.3776		3	Erlotinib	36.2	0.286	Good	1
	4	Sorafenib	3	5.014	21.0588	-0.212	0.613762	2.5778		4	Sorafenib	36.5	0.081	Good	1
	5	Sunitinib	48	5.946	24.9732	0.96	9.12011	38.3045		5	Sunitinib	4	0.455	Bad	0
	8	Nilotinib	29.1	4.495	18.879	0.44	2.75423	11.5678		6	Dasatinib	4	0.052	Good	1
	10	Axitinib	38	5.5	23.1	0.116	1.30617	5.48592		7	Lapatinib	14	0.066	Good	1
	11	Cabozantinib	4.4	3.505	14.721	0.251	1.78238	7.48599		8	Nilotinib	17	0.33	Bad	0
	13	Afatinib	92	9.071	38.0982	0.612	4.09261	17.1889		9	Vandetanib	19	0.106	Good	1
	14	Nintedanib	83	4.039	16.9638	0.465	2.91743	12.2532		10	Axitinib	4.3	0.134	Good	1
	16	Osimertinib	14.2	5.966	25.0572	0.632	4.28549	17.999		11	Cabozantinib	55	0.183	Good	1
	17	Brigatinib	12.7	3.747	15.7374	0.417	2.61216	10.9711		12	Regorafenib	28	0.076	Good	1
	18	Neratinib	216	3.974	16.6908	0.714	5.17607	21.7395		13	Afatinib	37	0.265	Good	1
	19	Dacomitinib	27	5.099	21.4158	0.674	4.72063	19.8266		14	Nintedanib	13.7	0.026	Good	1
	20	Erdafitinib	0.362	6.85	28.77	0.69	4.89779	20.5707		15	Lenvatinib	28	0.154	Good	1
	21	Avapritinib	19.5	7.686	32.2812	0.276	1.88799	7.92956		16	Osimertinib	48	0.291	Good	1
	22	Pemigatinib	10.6	7.267	30.5214	0.773	5.92925	24.9029		17	Brigatinib	25	0.366	Bad	0
	23	Ripretinib	15.3	3.717	15.6114	-0.073	0.845279	3.55017		18	Neratinib	12	0.551	Bad	0
	24	Tivozanib	0.75	3.447	14.4774	0.43	2.69153	11.3044		19	Dacomitinib	70	0.203	Good	1
		Mean	35.0901		24.7446			16.2213		20	Erdafitinib	59	0.193	Good	1
		SD	50.8256		8.67389			9.89261		21	Avapritinib	44.5	0.037	Good	1
										22	Pemigatinib	15.4	0.324	Bad	0
										23	Ripretinib	14.8	0.151	Good	1
										24	Tivozanib	111	0.306	Bad	0
		Clearance
			Experimental
		INN	Clearance (L/h)	Cl (L/h)	Cl (L/h)		ANOVA: Single Factor										Kruskal-Wallis Test						Levene's Tests			Pairwise t tests
			Experimental	ADMETlab 2.0	pkSCM
	1	Imatinib	11.8	34.839	21.8398		DESCRIPTION					Alpha	0.05					Experimental	ADMETlab 2.0	pkSCM			type	p-value		group 1	group 2	p-value	mean
	2	Gefitinib	35.7	34.4274	36.3287		Group	Count	Sum	Mean	Variance	SS	Std Err	Lower	Upper		median	15.3	23.1	16.3776			means	0.00172771		Experimental	ADMETlab 2.0	0.392685	10.3455
	3	Erlotinib	5.3	42.525	16.3776		Experimental	19	666.712	35.0901	2583.24	46498.3	6.95391	21.1484	49.0319		rank sum	536	675	442			medians	0.0386108		Experimental	pkSCM	0.128388	18.8688
	4	Sorafenib	3	21.0588	2.5778		ADMETlab 2.0	19	470.148	24.7446	75.2363	1354.25	6.95391	10.8029	38.6864		count	19	19	19	57		trimmed	0.00172771		ADMETlab 2.0	pkSCM	0.00774181	8.52336
	5	Sunitinib	48	24.9732	38.3045		pkSCM	19	308.204	16.2213	97.8637	1761.55	6.95391	2.27952	30.163		r^2/n	15120.8	23980.3	10282.3	49383.4
	8	Nilotinib	29.1	18.879	11.5678												H-stat				5.25017
	10	Axitinib	38	23.1	5.48592		ANOVA										H-ties				5.25017
	11	Cabozantinib	4.4	14.721	7.48599		Sources	SS	df	MS	F	P value	Eta-sq	RMSSE	Omega Sq		df				2
	13	Afatinib	92	38.0982	17.1889		Between Groups	3392.83	2	1696.41	1.84638	0.167632	0.0640072	0.311733	0.0288409		p-value				0.0724337
	14	Nintedanib	83	16.9638	12.2532		Within Groups	49614.1	54	918.78							alpha				0.05
	16	Osimertinib	14.2	25.0572	17.999		Total	53006.9	56	946.553							sig				no
	17	Brigatinib	12.7	15.7374	10.9711
	18	Neratinib	216	16.6908	21.7395
	19	Dacomitinib	27	21.4158	19.8266
	20	Erdafitinib	0.362	28.77	20.5707
	21	Avapritinib	19.5	32.2812	7.92956
	22	Pemigatinib	10.6	30.5214	24.9029
	23	Ripretinib	15.3	15.6114	3.55017
	24	Tivozanib	0.75	14.4774	11.3044
		Mean	35.0901	24.7446	16.2213
		SD	50.8256	8.67389	9.89261

## Sheet: Toxicity
			Experimental					ADMETlab 2.0				pkSCM	preADMET		vNN		admetSAR				ADMETlab 2.0				pkSCM	preADMET		vNN		admetSAR
		INN	Toxicity	Mutagenicity (Ames)	Carginogenic	Acute toxicity		hERG+ (Prob.)	Acute tox.+ (Prob.)	Ames+ (Prob.)	Carcinogenicity+ (Prob.)	AMES	Ames	hERG (risk)	hERG	Ames	Carcinogenicity	Ames	Acute toxicity		hERG	Acute tox.	Ames	Carcinogenicity	Ames	Ames	hERG	hERG	Ames	Carcinogenicity	Ames	Acute toxicity	Mutagenicity (Ames)	Carginogenic	Acute toxicity
	1	Imatinib	N.A.	YES	0.167	0.833		0.99	0.6	0.093	0.044	no	no	medium	yes	out	-0.7143	-0.59	0.7058		0	0	1	1	0	0	1	1	out	1	0	1	1	0	1
	2	Gefitinib	Reproductive toxicity	NA	0.58	1		0.928	0.693	0.411	0.074	no	yes	medium	yes	out	-0.9857	-0.54	0.7006		0	0	0	1	0	1	1	1	out	1	0	1	NA	1	1
	3	Erlotinib	Aqueous toxicity	NA	0.75	0.25		0.289	0.12	0.584	0.225	no	yes	medium	yes	out	-0.9286	-0.57	0.6971		1	0	0	1	0	1	1	1	out	1	0	0	NA	1	0
	4	Sorafenib	Reproductive & aqueous toxicity	NA	0.5	0		0.765	0.609	0.54	0.331	no	no	medium	out	out	-0.8	-0.51	0.4977		0	0	0	0	0	0	1	out	out	1	0	0	NA	1	0
	5	Sunitinib	Hepatotoxicity	NA	NA	NA		0.645	0.936	0.739	0.466	no	yes	medium	yes	out	-0.8571	-0.52	0.5912		0	0	0	0	0	1	1	1	out	1	0	0	NA	NA	NA
	6	Dasatinib	Reproductive & aqueous toxicity	NA	0.93	0.99		0.802	0.727	0.268	0.948	no	yes	medium	out	out	-0.8714	0.52	0.6476		0	0	1	0	0	1	1	out	out	1	0	0	NA	1	1
	7	Lapatinib	Hepatotoxicity	NO	NO	NO		0.92	0.388	0.536	0.022	yes	no	low	out	out	-0.9286	-0.54	0.5949		0	0	0	1	1	0	0	out	out	1	0	0	0	0	NO
	8	Nilotinib	Reproductive toxicity	NO	NO	NO		0.982	0.659	0.387	0.027	no	yes	medium	yes	out	-0.71473	0.54	0.5433		0	0	0	1	0	1	1	1	out	1	0	0	0	0	NO
	9	Vandetanib	Hepatotoxicity	NO	NA	0.83		0.988	0.718	0.015	0.047	no	yes	medium	yes	out	-0.9429	-0.52	0.652		0	0	1	1	0	1	1	1	out	1	0	0	0	NA	1
	10	Axitinib	NO	YES	NA	0.54		0.424	0.053	0.757	0.811	yes	yes	high	out	out	-0.831	-0.56	0.5982		0	1	0	0	1	1	1	out	out	1	0	0	1	NA	1
	11	Cabozantinib	Skin irritation	NA	NA	NA		0.237	0.812	0.823	0.896	no	no	medium	out	out	-0.8857	-0.55	0.5229		1	0	0	0	0	0	1	out	out	1	0	0	NA	NA	NA
	12	Regorafenib	Reproductive & aqueous toxicity	NA	NA	0.99		0.617	0.8	0.695	0.313	no	yes	medium	out	out	-0.8	-0.52	0.4977		0	0	0	0	0	1	1	out	out	1	0	0	NA	NA	1
	13	Afatinib	Respiratory toxicity	NA	NA	NA		0.577	0.617	0.814	0.608	no	no	medium	yes	out	-0.8857	-0.53	0.6927		0	0	0	0	0	0	1	1	out	1	0	0	NA	NA	NA
	14	Nintedanib	Skin irritation	NA	NO	0.8		0.935	0.204	0.018	0.078	no	no	medium	out	out	-0.9	-0.51	0.7132		0	1	1	1	0	0	1	out	out	1	0	1	NA	0	1
	15	Lenvatinib	Hypertension	NA	NA	NA		0.704	0.351	0.541	0.597	no	yes	medium	yes	out	-0.8534	-0.61	0.5484		0	0	0	0	0	1	1	1	out	1	0	0	NA	NA	NA
	16	Osimertinib	NA	NA	NA	NA		0.933	0.868	0.883	0.695	no	no	medium	out	out	-0.7819	0.56	0.6358		0	0	0	0	0	0	1	out	out	1	0	0	NA	NA	NA
	17	Brigatinib	Reproductive & aqueous toxicity	NO	NA	1		0.981	0.59	0.131	0.221	no	yes	low	out	out	-0.9714	-0.54	0.5995		0	0	1	1	0	1	0	out	out	1	0	0	0	NA	1
	18	Neratinib	Reproductive toxicity	NA	NA	NA		0.892	0.551	0.824	0.073	no	no	medium	out	out	-0.7888	-0.54	0.6594		0	0	0	1	0	0	1	out	out	1	0	0	NA	NA	NA
	19	Dacomitinib	NA	NO	NA	NA		0.978	0.887	0.683	0.087	no	no	medium	no	out	-0.8646	-0.66	0.5555		0	0	0	1	0	0	1	0	out	1	0	0	0	NA	NA
	20	Erdafitinib	Reproductive toxicity & skin irritation	NO	NA	1		0.906	0.17	0.072	0.063	no	no	medium	out	out	-0.9857	0.56	0.7124		0	1	1	1	0	0	1	out	out	1	0	1	0	NA	1
	21	Avapritinib	NA	NA	NA	NA		0.812	0.16	0.209	0.96	no	yes	medium	out	out	-0.8857	-0.62	0.5266		0	1	1	0	0	1	1	out	out	1	0	0	NA	NA	NA
	22	Pemigatinib	Reproductive toxicity	NA	NA	NA		0.782	0.742	0.538	0.139	no	yes	medium	out	out	-0.9134	0.61	0.7036		0	0	0	0	0	1	1	out	out	1	0	1	NA	NA	NA
	23	Ripretinib	Hepatotoxicity	NA	NA	NA		0.885	0.488	0.932	0.07	no	no	high	out	out	-0.8571	-0.51	0.722		0	0	0	1	0	0	1	out	out	1	0	1	NA	NA	NA
	24	Tivozanib	NA	NA	NA	NA		0.228	0.319	0.878	0.82	no	yes	medium	out	out	-0.8857	0.53	0.587		1	0	0	0	0	1	1	out	out	1	0	0	NA	NA	NA
																					3	4	7	12	2	13	22	8	0	24	0	6	2	4	9
																					12.5	16.6667	29.1667	50	8.33333	54.1667	91.6667	33.3333	0	100	0	25	8.33333	16.6667	37.5

## Sheet: Metabolism
		ADMETlab		admetSAR		OCHEM	pkCSM		preADMET		vNN	SwissADME
		CYP3A4-inh	CYP3A4-sub	CYP3A4 substrate	CYP3A4 inhibition	CYP3A4		CYP3A4	3A4		3A4	CYP3A4 inhibitor
	1	0.871	0.898	0.6474	-0.9313	inhibitor		s/i	substrate		out	Yes
	2	0.909	0.814	0.6674	0.8206	inhibitor		s/i	substrate		inh	Yes
	3	0.898	0.85	0.5852	0.7194	inhibitor		s/i	substrate		inh	Yes
	4	0.723	0.216	0.6576	-0.7339	non-inh.		s	non-inhibitor		out	Yes
	5	0.441	0.657	0.6352	-0.5991	non-inh.		s/i	substrate		out	Yes
	6	0.657	0.913	0.713	0.7295	non-inh.		s/i	inhibitor		out	Yes
	7	0.97	0.821	0.6943	0.8065	inhibitor		s/i	substrate		inh	Yes
	8	0.96	0.777	0.6277	0.6784	inhibitor		s/i	substrate		out	Yes
	9	0.456	0.864	0.6385	0.5288	inhibitor		i	substrate		inh	No
	10	0.863	0.217	0.5768	0.7865	inhibitor		s/i	non-inhibitor		out	Yes
	11	0.556	0.886	0.6675	-0.6808	inhibitor		s/i	non-inhibitor		out	Yes
	12	0.816	0.167	0.6596	-0.7339	non-inh.		s/i	non-inhibitor		out	Yes
	13	0.914	0.663	0.7171	-0.6486	inhibitor		s/i	substrate		out	Yes
	14	0.525	0.949	0.6999	-0.6456	inhibitor		s/i	inhibitor		out	No
	15	0.613	0.154	0.6583	0.5	inhibitor		s/i	non-inhibitor		out	Yes
	16	0.169	0.923	0.7243	0.7324	inhibitor		s/i	inh / sub		out	Yes
	17	0.255	0.94	0.7128	-0.6629	inhibitor		s/i	inhibitor		out	No
	18	0.901	0.849	0.7417	0.6708	inhibitor		s/i	inhibitor		out	Yes
	19	0.815	0.543	0.6719	0.8521	inhibitor		s/i	substrate		inh	Yes
	20	0.669	0.892	0.6182	-0.5297	non-inh.		s/i	non-inhibitor		out	Yes
	21	0.427	0.926	0.6478	-0.8382	inhibitor		s/i	non-inhibitor		out	Yes
	22	0.71	0.924	0.6287	0.6032	inhibitor		s/i	inh / sub		out	Yes
	23	0.784	0.245	0.6043	-0.8795	inhibitor		s/i	substrate		out	Yes
	24	0.838	0.644	0.679	0.5317	inhibitor		s/i	non-inhibitor		out	Yes
		ADMETlab		admetSAR		OCHEM	pkCSM		preADMET		vNN	SwissADME
		inhibitor	substrate	substrate	inhibition	inhibition	substrate	inhibition	substrate	inhibitor	3A4	CYP3A4 inhibitor
	1	1	1	1	0	1	1	1	1	0	out	1
	2	1	1	1	1	1	1	1	1	0	1	1
	3	1	1	1	1	1	1	1	1	0	1	1
	4	1	0	1	0	0	1	1	0	0	out	1
	5	0	1	1	0	0	1	1	1	0	out	1
	6	1	1	1	1	0	1	1	0	1	out	1
	7	1	1	1	1	1	1	1	1	0	1	1
	8	1	1	1	1	1	1	1	1	0	out	1
	9	0	1	1	1	1	0	0	1	0	1	0
	10	1	0	1	1	1	1	1	0	0	out	1
	11	1	1	1	0	1	1	1	0	0	out	1
	12	1	0	1	0	0	1	1	0	0	out	1
	13	1	1	1	0	1	1	1	1	1	out	1
	14	0	1	1	0	1	1	1	0	1	out	0
	15	1	0	1	0	1	1	1	0	0	out	1
	16	0	1	1	1	1	1	1	1	1	out	1
	17	0	1	1	0	1	1	1	0	1	out	0
	18	1	1	1	1	1	1	1	0	1	out	1
	19	1	0	1	1	1	1	1	1	0	1	1
	20	1	1	1	0	0	1	1	0	0	out	1
	21	0	1	1	0	1	1	1	0	0	out	1
	22	1	1	1	1	1	1	1	1	1	out	1
	23	1	0	1	0	1	1	1	0	0	out	1
	24	1	1	1	1	1	1	1	0	0	out	1
		18	18	24	12	19	23	23	11	7	5	21
		75	75	100	50	79.1667	95.8333	95.8333	45.8333	29.1667	20.8333	87.5
